# Supplementary material
Source: Royal Society of Chemistry journal article supplement (doi:10.1039/d6nj00725b)
Supplement: d6nj00725b1.pdf [file d6nj00725b1.pdf]

## Sustainable Access to (E)-2-(2-benzylidenehydrazinyl)-4-phenylthiazoles by Ruthenium(II) Catalyst via Dehydrogenative Coupling of Alcohols

Saranya Sundar<sup>a</sup>, Anandaraj Pennamuthiriyar<sup>b</sup> and Ramesh Rengan<sup>c\*</sup> and Jan Grzegorz Malecki<sup>d</sup>

<sup>[a]</sup>PG and Research Department of Chemistry, SeethalakshmiRamaswami College, Affiliated to Bharathidasan University, Tiruchirappalli 620002, Tamil Nadu, India.

<sup>[b]</sup>K.Ramakrishnan College of Engineering, Department of Chemistry, Samayapuram, Affiliated to Anna University, Tiruchirappalli – 621 112, Tamil Nadu, India.

<sup>[c]</sup>Department of Chemistry, Gandhigram Rural Institute, Gandhigram – 624302, Tamil Nadu, India. E-mail: [drramesh@gmail.com](mailto:drramesh@gmail.com); [rramesh\\_bdu@yahoo.com](mailto:rramesh_bdu@yahoo.com),

<sup>[d]</sup>WSB University, Cieplaka 1C Szkolna 9, 41-300 Dąbrowa Górnicza, Poland.

| S. No | Contents                                                          | Page. no |
|-------|-------------------------------------------------------------------|----------|
| 1     | Experimental section.....                                         | 2        |
| 2     | X-ray crystallography.....                                        | 3        |
| 3     | Table of crystal data and refinement parameters for complex ..... | 4        |
| 4     | Selected Bond Distances (Å) and Angles (deg) .....                | 5-6      |
| 5     | NMR Spectra of Complex .....                                      | 7        |
| 6     | HRMS Spectra of Complex .....                                     | 8        |
| 7     | NMR Spectra of catalytic products .....                           | 9-23     |
| 8     | NMR Spectra of Intermediates.....                                 | 24-25    |
| 9     | HRMS Spectra of new catalytic products .....                      | 26-30    |
| 10    | Confirmation of H <sub>2</sub> gas.....                           | 30       |
| 11    | Characterization of catalytic products.....                       | 32-36    |
| 12    | HRMS Spectrum of 2-benzylidenehydrazinecarbothioamide (E)         | 37       |
| 13    | References.....                                                   | 38       |

## 1. Experimental section

### Methods and materials

CHNS elemental Vario EL III elemental analyzer instrument was used to perform elemental analyses (C, H, and N). Perkin-Elmer 597 spectrophotometers have been used to record FT-IR spectra of the complexes in the range 4000–400  $\text{cm}^{-1}$ . Melting points were determined by Boetius micro heating table melting point apparatus and are uncorrected.  $^1\text{H}$  and  $^{13}\text{C}$  NMR spectra were recorded in Bruker 400 MHz in using TMS as an internal standard. Spectrometer using  $\text{CDCl}_3/\text{d}_6$ -DMSO as solvents on 400 and 100 MHz instruments respectively. The mass spectral data for all the complexes were obtained by a Micro mass Thermo scientific LTQ XL mass spectrometer. Ruthenium precursor, (97%), Benzhydrazides (95–98%), solvents, Thiosemicarbazide, 2-bromoactophenone and primary alcohols were purchased from commercial suppliers and used as received. Reagent grade solvents purchased from standard suppliers were purified and dried according to standard procedures.<sup>1</sup>The gas chromatograph analysis for the detection of hydrogen gas was performed on an Agilent GC 8890 and a TCD detector, injection temperature = 50 °C, column temperature = 80 °C, detector temperature (TCD) = 180 °C, carrier gas =  $\text{He}_2$ .

## 2. X-ray Crystallography

A single crystal with high quality and exhibiting good morphology was chosen for X-ray diffraction intensity measurements. The X-ray diffraction intensity data was collected at room temperature (293 K) on a Bruker D8 Quest Eco diffractometer using MoK $\alpha$  radiation (0.71073 Å). During the data collection, the crystal to detector distance was set to 4.5 cm. The data collection was monitored by APEX-III program suit.<sup>2</sup> further, the integration, Lorentz and polarization corrections and merging of data were carried out using SAINT. The absorption correction was performed by SADABS and the data was averaged using SORTAV software.<sup>3</sup> The hydrogen atoms of all C–H, N–H and O–H hydrogen bonds were located from the difference Fourier map and were refined isotropically. Idealized methyl group H-atom position was calculated geometrically [C–H = 0.96 Å] and refined using riding model with Uiso(H) = 1.5 Ueq (C). The structure was solved by direct methods using SHELXS-2014<sup>4</sup> and refined by SHELXL-2014<sup>5</sup> programs incorporated to WINGX package.<sup>6</sup> The ORTEP of the molecule with displacement ellipsoids drawn at 50% probability level are shown in (Fig. 1). The molecular and packing diagrams were generated using the software MERCURY. The CCDC number of complex 1 is **2424426**.

## Crystal Structure of Ruthenium(II) Complex 1

The molecular structure of ruthenium(II) complex **1** were confirmed by single-crystal X-ray diffraction study. The single crystals were grown by slow evaporation with a 1:1 ratio of petroleum ether and dichloromethane solvent at room temperature. The complex **1** was crystallized in a monoclinic crystal system with a "P2<sub>1</sub>/n" space group. The solid state structure was revealed that the hydrazone ligand is coordinated to ruthenium ion via hydrazide nitrogen and carbonyl oxygen atoms via bidentate N<sup>∧</sup>O fashion with the formation of one six membered chelated ring with chlorine and phenyl ring. The bite angles and bond distance of the complex O1-Ru1-Cl1, 84.42(6); O1-Ru1-N1, 88.68(8); O1-Ru1-C18, 108.21(9); O1-Ru1-C19, 85.54(9); O1-Ru1-C20, 91.91(9); N1-Ru1-Cl1, 83.95(6); N1-Ru1-C18, 99.36(10); N1-Ru1-C19, 129.82(10) and Ru1-Cl1, 2.4081(7); Ru1-O1 2.0879(18); Ru1-N1, 2.093(2); Ru1-C18, 2.213(18); Ru1-C19, 2.164(3); Ru1-C20, 2.188(3) are respectively. The ORTEP representation of the ruthenium complex is illustrated in **Figure 1**. One molecule ligand has donor sites of the atoms forms a octahedron coordination around the ruthenium ion. The bond lengths and angles of the Ru(II) complex was comparable with other reported ruthenium complex.<sup>26</sup> The X-ray crystallographic parameters, details of data collection, structure refinements and selected bond lengths / angles are summarized in supporting information.

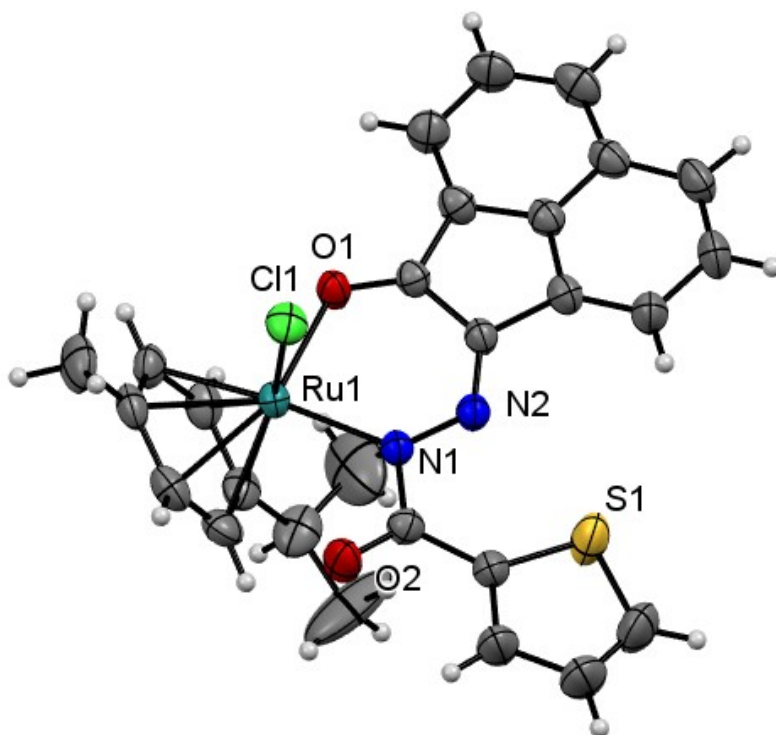

**Figure 1.** ORTEP view of the Complex **1** (CCDC: 2424426). The thermal ellipsoids are drawn with a 30% probability level. The selected bond distances (Å) and angles (°) O1-Ru1-Cl1, 84.42(6); O1-Ru1-N1, 88.68(8); O1-Ru1-C18, 108.21(9); O1-Ru1-C19, 85.54(9); O1-Ru1-C20, 91.91(9); N1-Ru1-Cl1, 83.95(6); N1-Ru1-C18, 99.36(10); N1-Ru1-C19, 129.82(10); O1-

C1-C2, 127.4(2); O1-C1-C11, 125.7(2) and Ru1-C11, 2.4081 (7); Ru1-O1 2.0879(18); Ru1-N1, 2.093(2); Ru1-C18, 2.213(18); Ru1-C19,2.164(3); Ru1-C20, 2.188(3); O1-C1, 1.237(3), O2-C13, 1.207(3); S1-C14, 1.703(3); S1-C17, 1.692(3).

**Table S1. Crystal data and structure refinement for complex**

| Identification code                         | Complex 1                                                           |
|---------------------------------------------|---------------------------------------------------------------------|
| Empirical formula                           | C <sub>30</sub> H <sub>26</sub> ClN <sub>2</sub> O <sub>2</sub> RuS |
| Formula weight                              | 576.05                                                              |
| Temperature/K                               | 295(2)                                                              |
| Crystal system                              | monoclinic                                                          |
| Space group                                 | P2 <sub>1</sub> /n                                                  |
| a/Å                                         | 18.7959(9)                                                          |
| b/Å                                         | 7.7136(3)                                                           |
| c/Å                                         | 19.3582(10)                                                         |
| α/°                                         | 90                                                                  |
| β/°                                         | 111.100(6)                                                          |
| γ/°                                         | 90                                                                  |
| Volume/Å <sup>3</sup>                       | 2618.4(2)                                                           |
| Z                                           | 4                                                                   |
| ρ <sub>calc</sub> /cm <sup>3</sup>          | 1.461                                                               |
| μ/mm <sup>-1</sup>                          | 0.806                                                               |
| F(000)                                      | 1168.0                                                              |
| Crystal size/mm <sup>3</sup>                | 0.27 × 0.17 × 0.11                                                  |
| Radiation                                   | Mo Kα (λ = 0.71073)                                                 |
| 2θ range for data collection/°              | 6.79 to 59.004                                                      |
| Index ranges                                | -26 ≤ h ≤ 22, -10 ≤ k ≤ 10, -23 ≤ l ≤ 26                            |
| Reflections collected                       | 15153                                                               |
| Independent reflections                     | 6310 [R <sub>int</sub> = 0.0340, R <sub>sigma</sub> = 0.0453]       |
| Data/restraints/parameters                  | 6310/0/310                                                          |
| Goodness-of-fit on F <sup>2</sup>           | 1.039                                                               |
| Final R indexes [I ≥ 2σ (I)]                | R <sub>1</sub> = 0.0363, wR <sub>2</sub> = 0.0783                   |
| Final R indexes [all data]                  | R <sub>1</sub> = 0.0533, wR <sub>2</sub> = 0.0875                   |
| Largest diff. peak/hole / e Å <sup>-3</sup> | 0.45/-0.42                                                          |

**Table S2. Selected bond angles and lengths**

| Atom | Atom | Length/Å   |  | Atom | Atom | Length/Å |
|------|------|------------|--|------|------|----------|
| Ru1  | C11  | 2.4081(7)  |  | C5   | C6   | 1.360(4) |
| Ru1  | O1   | 2.0879(18) |  | C6   | C7   | 1.416(4) |
| Ru1  | N1   | 2.093(2)   |  | C7   | C8   | 1.404(4) |
| Ru1  | C18  | 2.213(3)   |  | C7   | C12  | 1.399(4) |
| Ru1  | C19  | 2.164(3)   |  | C8   | C9   | 1.364(5) |
| Ru1  | C20  | 2.188(3)   |  | C9   | C10  | 1.411(4) |
| Ru1  | C21  | 2.208(3)   |  | C10  | C11  | 1.372(4) |
| Ru1  | C22  | 2.163(3)   |  | C11  | C12  | 1.398(4) |
| Ru1  | C23  | 2.165(3)   |  | C13  | C14  | 1.478(4) |
| S1   | C14  | 1.703(3)   |  | C14  | C15  | 1.381(4) |
| S1   | C17  | 1.692(3)   |  | C15  | C16  | 1.406(5) |
| O1   | C1   | 1.237(3)   |  | C16  | C17  | 1.318(5) |
| O2   | C13  | 1.207(3)   |  | C18  | C19  | 1.419(4) |
| N1   | N2   | 1.320(3)   |  | C18  | C23  | 1.414(4) |
| N1   | C13  | 1.407(3)   |  | C18  | C24  | 1.503(4) |
| N2   | C2   | 1.302(3)   |  | C19  | C20  | 1.399(4) |
| C1   | C2   | 1.472(4)   |  | C20  | C21  | 1.393(4) |
| C1   | C11  | 1.464(4)   |  | C21  | C22  | 1.411(4) |
| C2   | C3   | 1.467(4)   |  | C21  | C27  | 1.490(4) |
| C3   | C4   | 1.364(4)   |  | C22  | C23  | 1.386(4) |
| C3   | C12  | 1.412(4)   |  | C24  | C25  | 1.483(6) |
| C4   | C5   | 1.416(4)   |  | C24  | C26  | 1.499(5) |

| Atom | Atom | Atom | Angle/°    | Atom | Atom | Atom | Angle/°   |
|------|------|------|------------|------|------|------|-----------|
| O1   | Ru1  | C11  | 84.42(6)   | C3   | C4   | C5   | 118.8(3)  |
| O1   | Ru1  | N1   | 88.68(8)   | C6   | C5   | C4   | 123.1(3)  |
| O1   | Ru1  | C18  | 108.21(10) | C5   | C6   | C7   | 119.9(3)  |
| O1   | Ru1  | C19  | 85.54(9)   | C8   | C7   | C6   | 128.6(3)  |
| O1   | Ru1  | C20  | 91.91(9)   | C12  | C7   | C6   | 116.0(3)  |
| O1   | Ru1  | C21  | 121.76(10) | C12  | C7   | C8   | 115.4(3)  |
| O1   | Ru1  | C22  | 158.53(10) | C9   | C8   | C7   | 121.7(3)  |
| O1   | Ru1  | C23  | 145.63(10) | C8   | C9   | C10  | 121.9(3)  |
| N1   | Ru1  | C11  | 83.95(6)   | C11  | C10  | C9   | 117.8(3)  |
| N1   | Ru1  | C18  | 99.36(10)  | C10  | C11  | C1   | 133.2(3)  |
| N1   | Ru1  | C19  | 129.82(10) | C10  | C11  | C12  | 119.8(3)  |
| N1   | Ru1  | C20  | 167.09(10) | C12  | C11  | C1   | 106.9(2)  |
| N1   | Ru1  | C21  | 148.08(10) | C7   | C12  | C3   | 124.2(3)  |
| N1   | Ru1  | C22  | 112.74(10) | C11  | C12  | C3   | 112.5(2)  |
| N1   | Ru1  | C23  | 93.15(10)  | C11  | C12  | C7   | 123.3(3)  |
| C18  | Ru1  | C11  | 166.92(8)  | O2   | C13  | N1   | 119.7(2)  |
| C19  | Ru1  | C11  | 144.44(8)  | O2   | C13  | C14  | 118.8(2)  |
| C19  | Ru1  | C18  | 37.81(11)  | N1   | C13  | C14  | 121.4(2)  |
| C19  | Ru1  | C20  | 37.50(11)  | C13  | C14  | S1   | 129.6(2)  |
| C19  | Ru1  | C21  | 67.54(11)  | C15  | C14  | S1   | 110.5(2)  |
| C19  | Ru1  | C23  | 67.14(11)  | C15  | C14  | C13  | 119.9(3)  |
| C20  | Ru1  | C11  | 108.95(8)  | C14  | C15  | C16  | 111.9(3)  |
| C20  | Ru1  | C18  | 68.22(11)  | C17  | C16  | C15  | 113.1(3)  |
| C20  | Ru1  | C21  | 36.94(11)  | C16  | C17  | S1   | 112.9(3)  |
| C21  | Ru1  | C11  | 89.35(8)   | C19  | C18  | Ru1  | 69.19(15) |
| C21  | Ru1  | C18  | 81.16(11)  | C19  | C18  | C24  | 121.7(3)  |
| C22  | Ru1  | C11  | 98.73(9)   | C23  | C18  | Ru1  | 69.30(16) |
| C22  | Ru1  | C18  | 68.28(12)  | C23  | C18  | C19  | 115.3(3)  |
| C22  | Ru1  | C19  | 79.60(12)  | C23  | C18  | C24  | 123.0(3)  |
| C22  | Ru1  | C20  | 66.91(11)  | C24  | C18  | Ru1  | 131.2(2)  |
| C22  | Ru1  | C21  | 37.64(11)  | C18  | C19  | Ru1  | 73.00(15) |
| C22  | Ru1  | C23  | 37.37(11)  | C20  | C19  | Ru1  | 72.21(16) |
| C23  | Ru1  | C11  | 129.91(9)  | C20  | C19  | C18  | 122.3(3)  |
| C23  | Ru1  | C18  | 37.67(11)  | C19  | C20  | Ru1  | 70.29(16) |
| C23  | Ru1  | C20  | 79.15(11)  | C21  | C20  | Ru1  | 72.31(16) |
| C23  | Ru1  | C21  | 67.68(12)  | C21  | C20  | C19  | 121.0(3)  |
| C17  | S1   | C14  | 91.74(16)  | C20  | C21  | Ru1  | 70.75(16) |
| C1   | O1   | Ru1  | 124.28(16) | C20  | C21  | C22  | 117.6(3)  |
| N2   | N1   | Ru1  | 128.07(15) | C20  | C21  | C27  | 121.7(3)  |
| N2   | N1   | C13  | 111.2(2)   | C22  | C21  | Ru1  | 69.42(16) |
| C13  | N1   | Ru1  | 120.68(17) | C22  | C21  | C27  | 120.6(3)  |
| C2   | N2   | N1   | 122.4(2)   | C27  | C21  | Ru1  | 128.3(2)  |
| O1   | C1   | C2   | 127.4(2)   | C21  | C22  | Ru1  | 72.94(16) |
| O1   | C1   | C11  | 125.7(2)   | C23  | C22  | Ru1  | 71.39(16) |
| C11  | C1   | C2   | 107.0(2)   | C23  | C22  | C21  | 121.1(3)  |
| N2   | C2   | C1   | 129.1(2)   | C18  | C23  | Ru1  | 73.03(16) |
| N2   | C2   | C3   | 123.6(2)   | C22  | C23  | Ru1  | 71.24(16) |
| C3   | C2   | C1   | 107.3(2)   | C22  | C23  | C18  | 122.6(3)  |
| C4   | C3   | C2   | 135.8(3)   | C25  | C24  | C18  | 112.8(3)  |
| C4   | C3   | C12  | 118.0(3)   | C25  | C24  | C26  | 110.5(4)  |

## 5. NMR spectra of Ru(II)complex

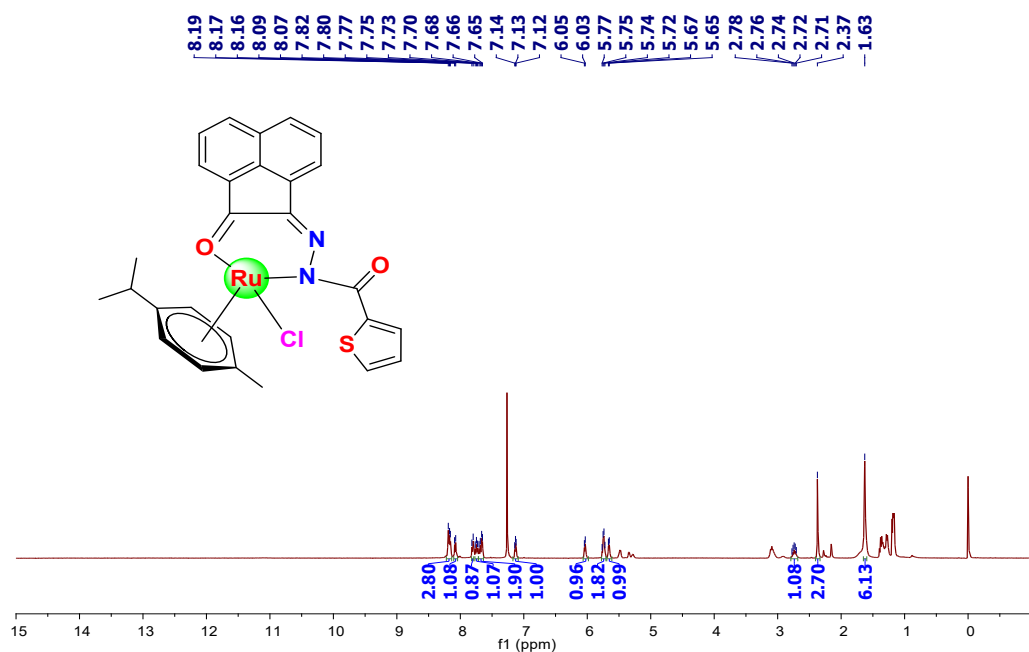

Figure S2. <sup>1</sup>H NMR spectrum of complex 1 in CDCl<sub>3</sub> (400 MHz, 300 K)

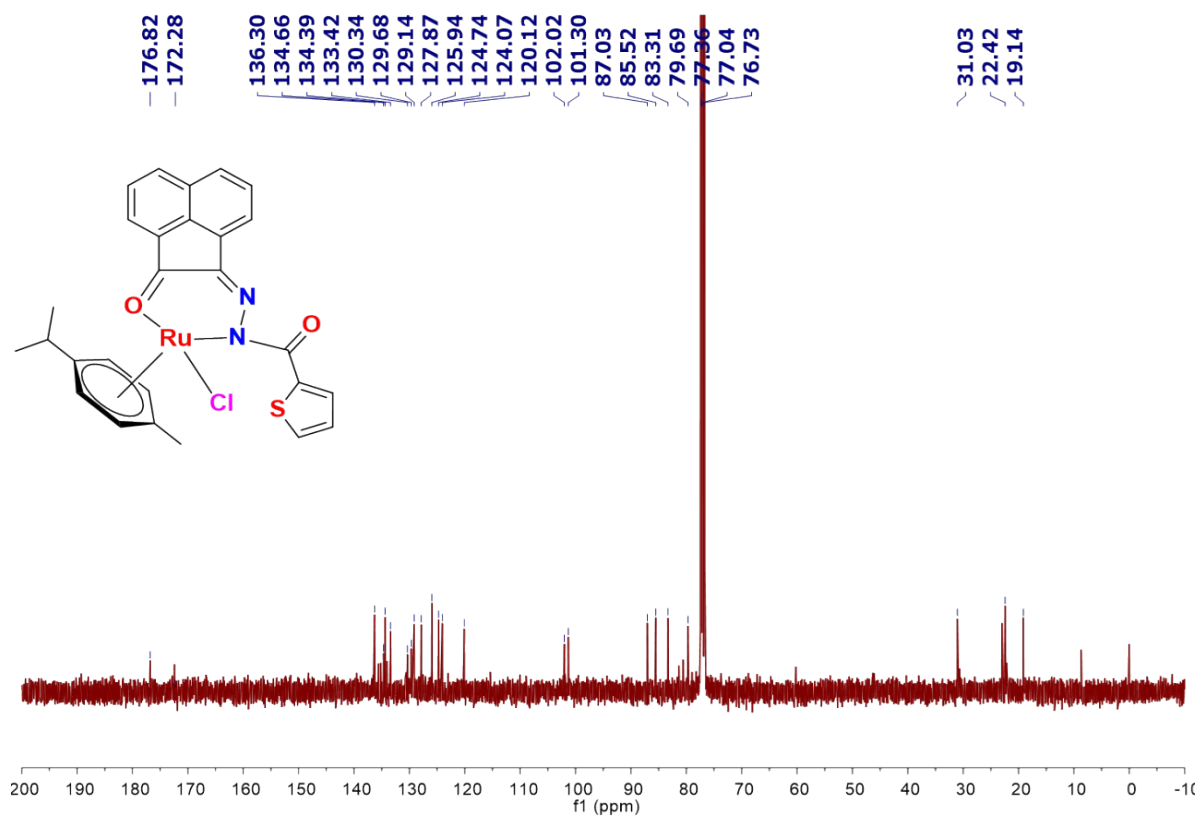

Figure S3. <sup>13</sup>C {<sup>1</sup>H} NMR spectrum of complex 1 in CDCl<sub>3</sub> (100 MHz, 300 K)

## 6. HRMS spectrum of Ru(II) complex

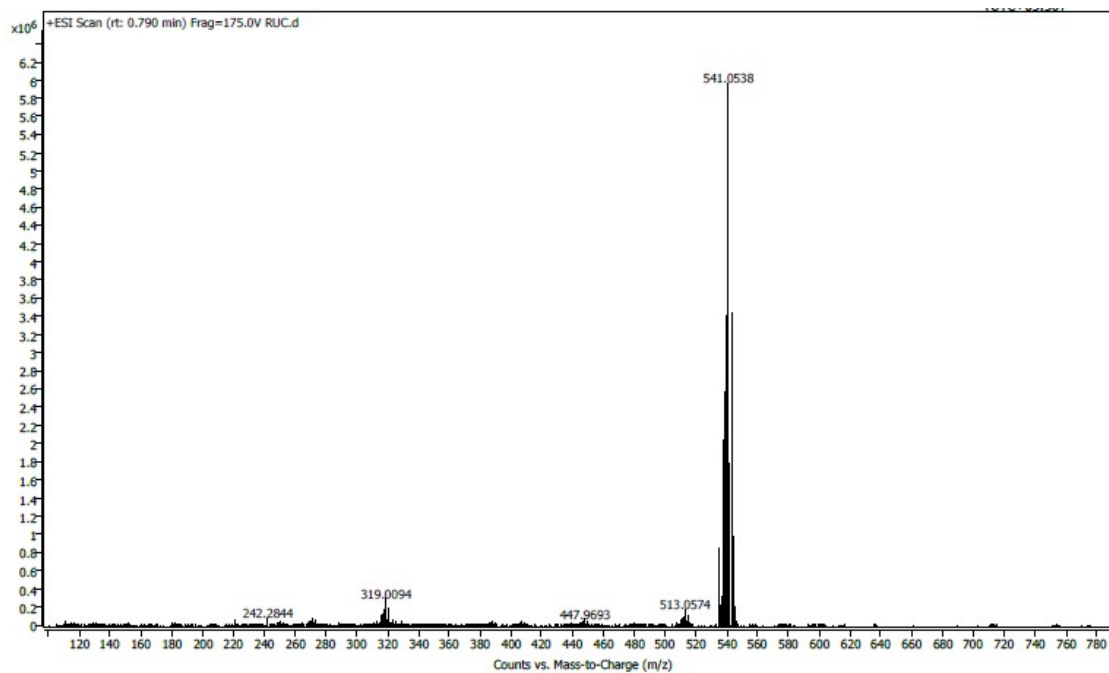

**Figure S4.**HRMS spectrum of complex 1

(ESI-TOF) m/z: [M-Cl]<sup>+</sup>Calcd for C<sub>27</sub>H<sub>23</sub>ClN<sub>2</sub>O<sub>2</sub>RuS 541.0524; Found 541.0538.

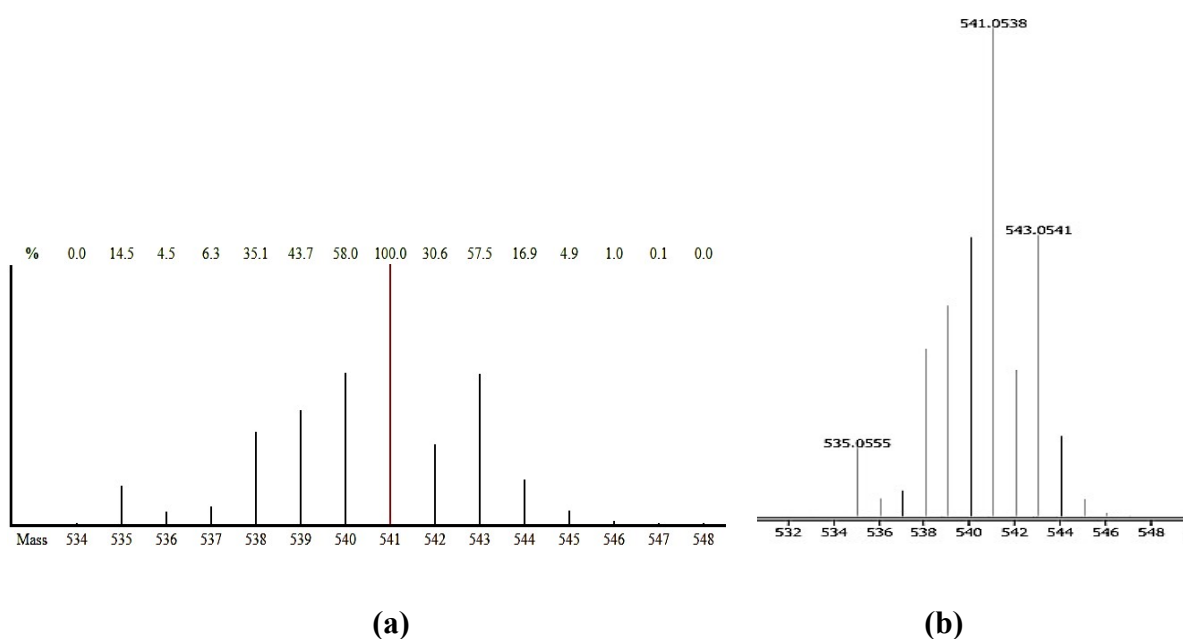

**Figure S4(i).** Simulated (a) and experimental (b) pattern of the complex

## 7. NMR spectra of catalytic products

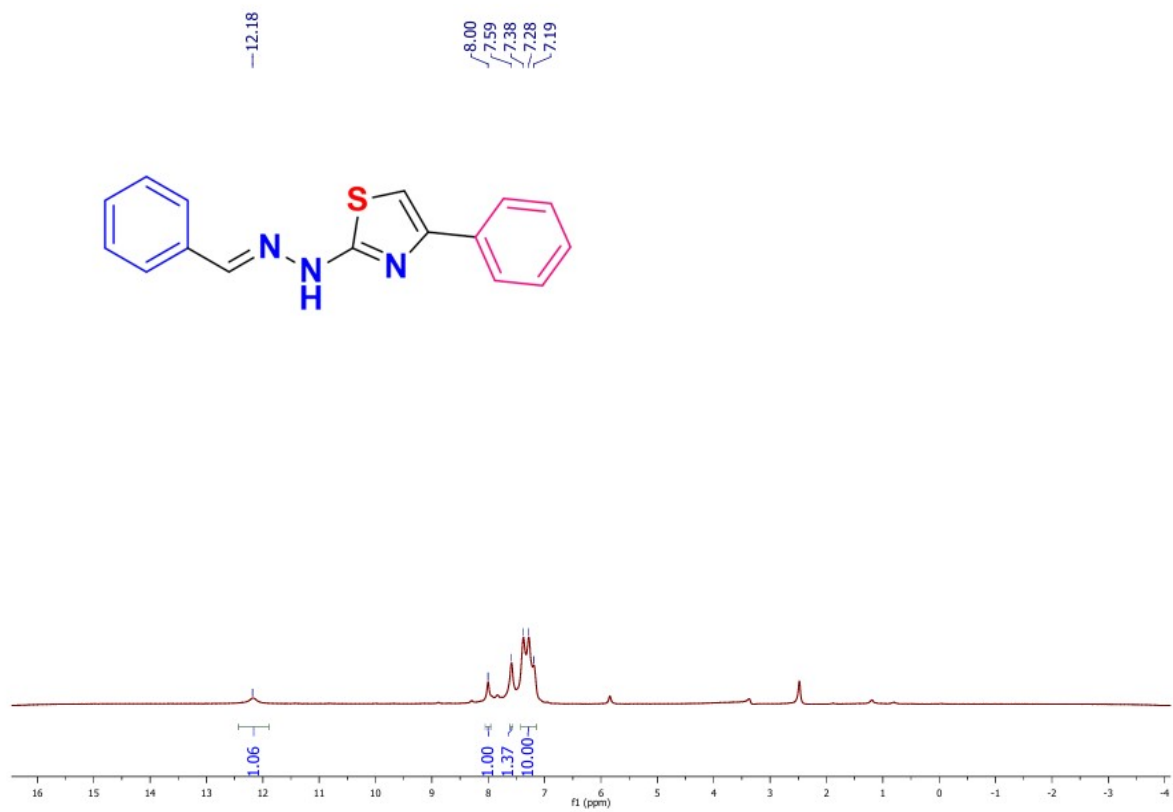

**Figure S5.**  $^1\text{H}$  NMR spectrum of **4a** in  $\text{DMSO-d}_6$  (400 MHz, 300 K)

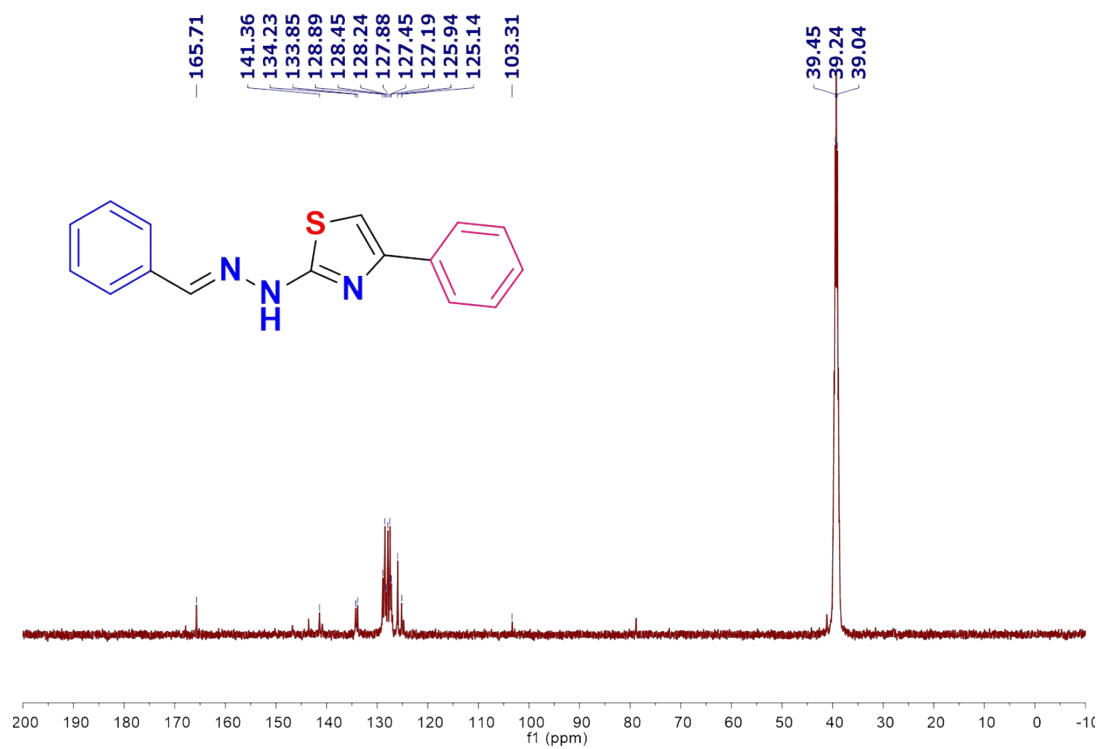

Figure S6.  $^{13}\text{C}\{^1\text{H}\}$  NMR spectrum of **4a** in DMSO- $\text{d}_6$ (100 MHz, 300 K)

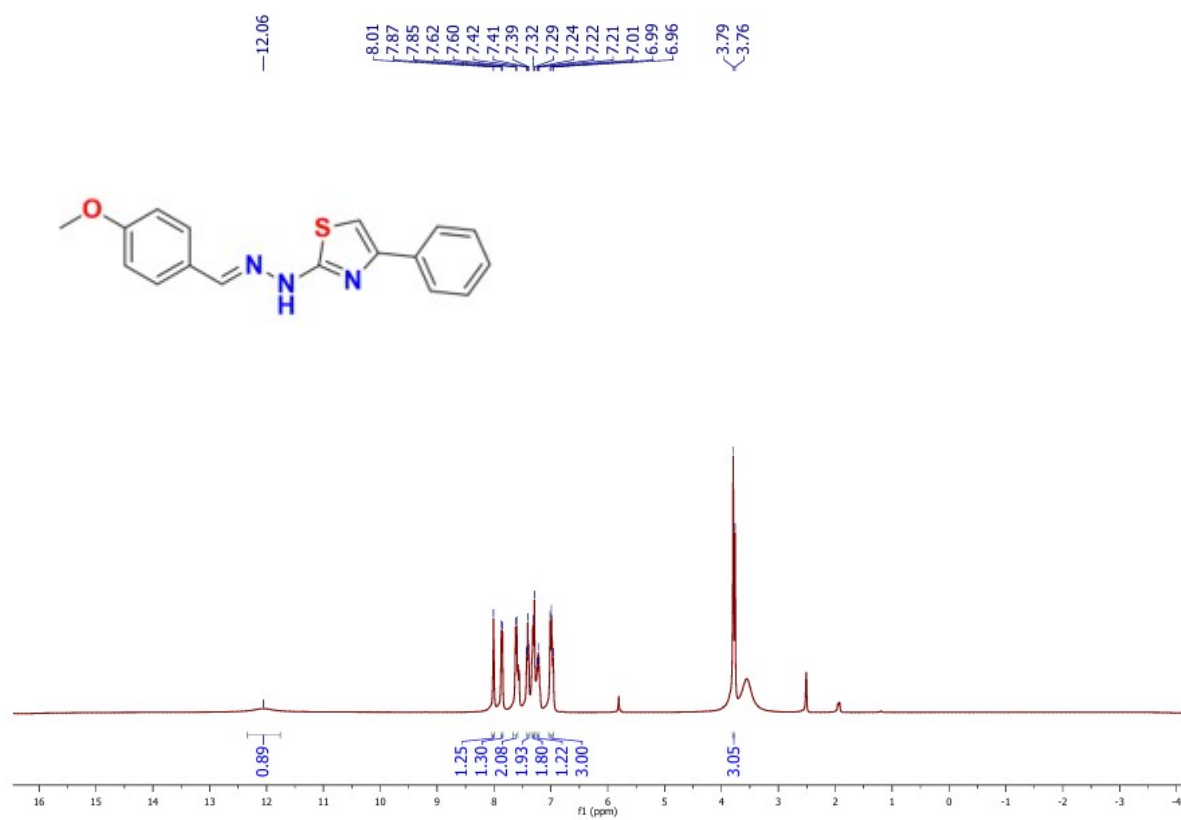

Figure S7.  $^1\text{H}$  NMR spectrum of **4b** in DMSO- $\text{d}_6$ (400 MHz, 300 K)

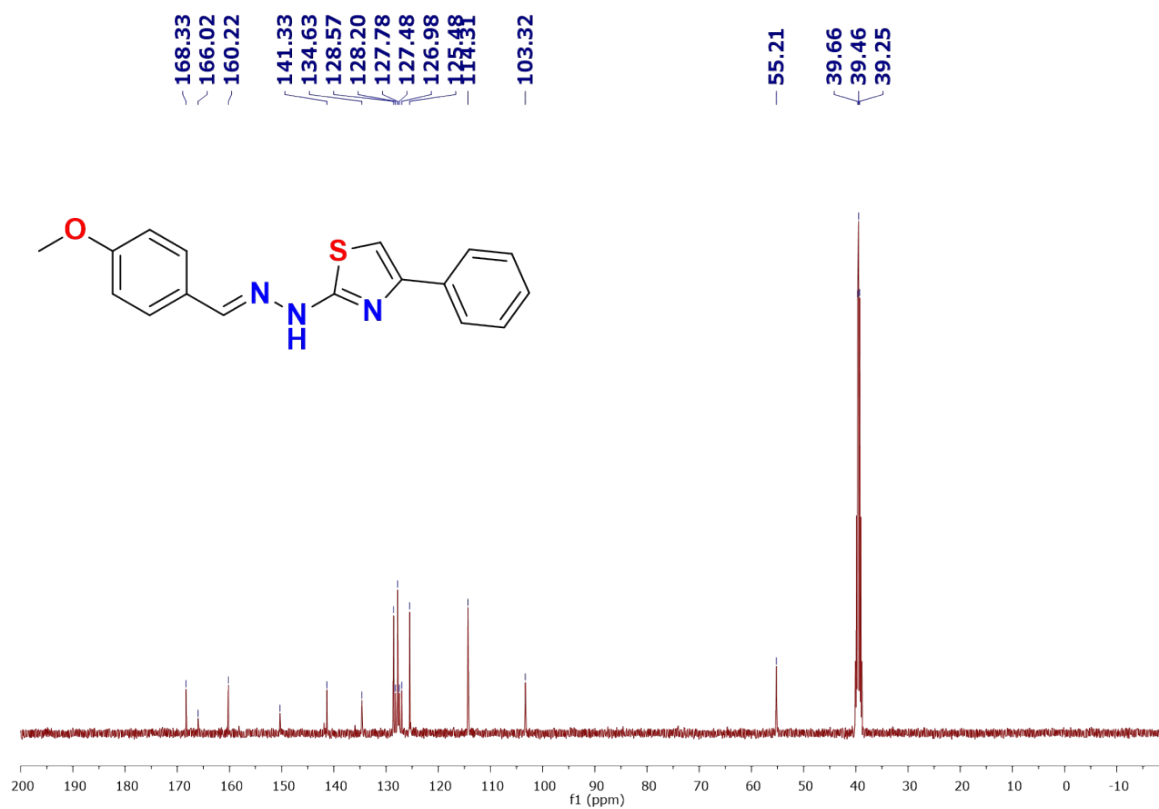

**Figure S8.**  $^{13}\text{C}\{^1\text{H}\}$  NMR spectrum of **4b** in DMSO- $d_6$  (100 MHz, 300 K)

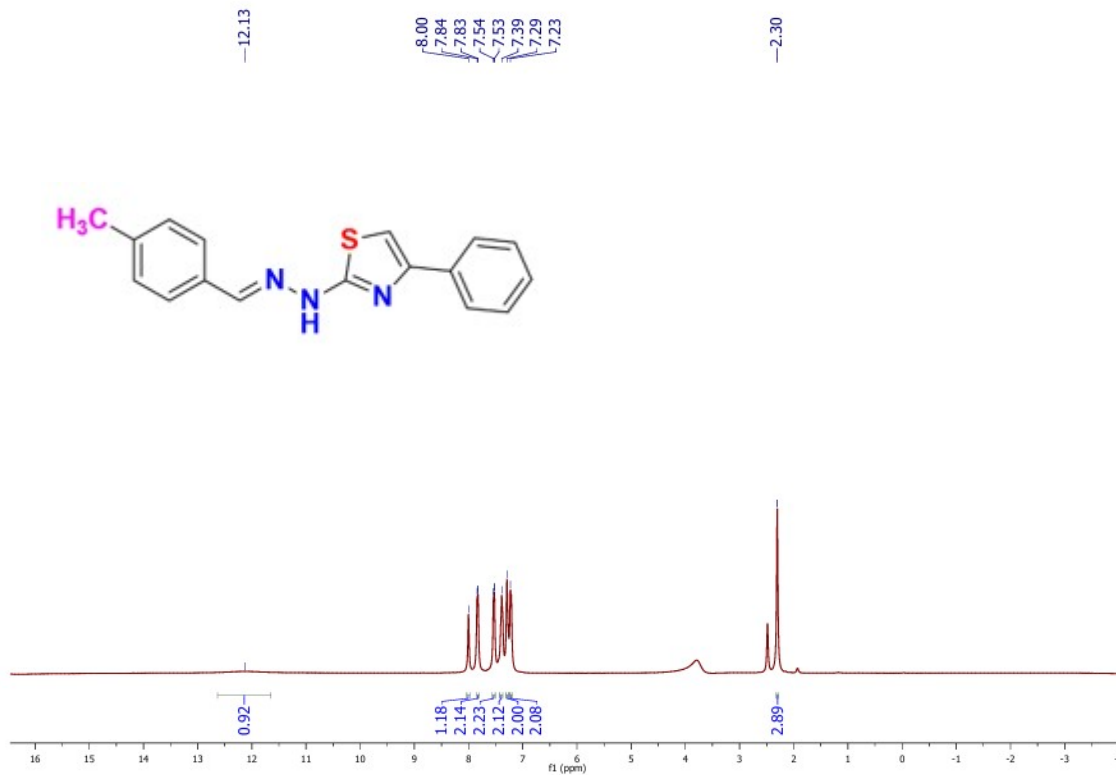

**Figure S9.**  $^1\text{H}$  NMR spectrum of **4c** in DMSO- $d_6$  (400 MHz, 300 K)

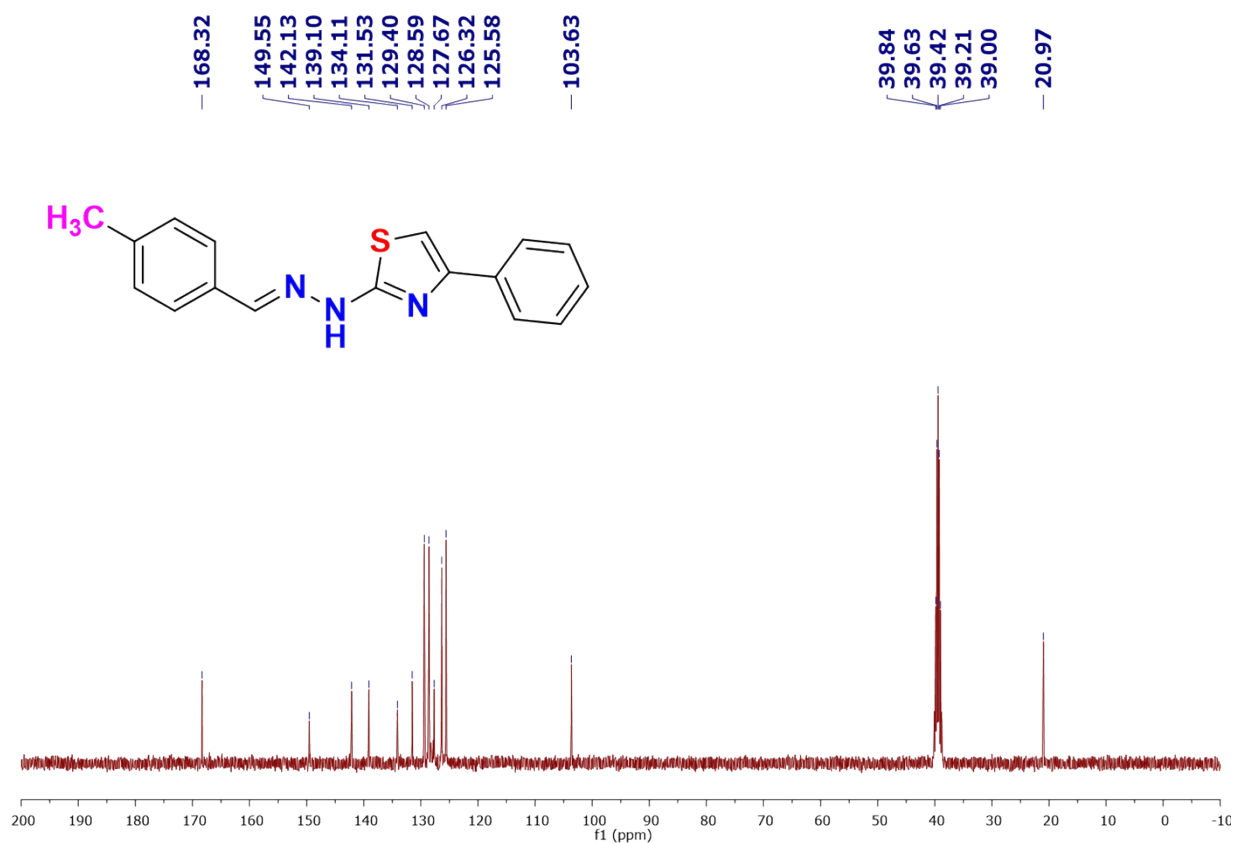

**Figure S10.**  $^{13}\text{C}\{^1\text{H}\}$  NMR spectrum of **4c** in DMSO- $\text{d}_6$  (100 MHz, 300 K)

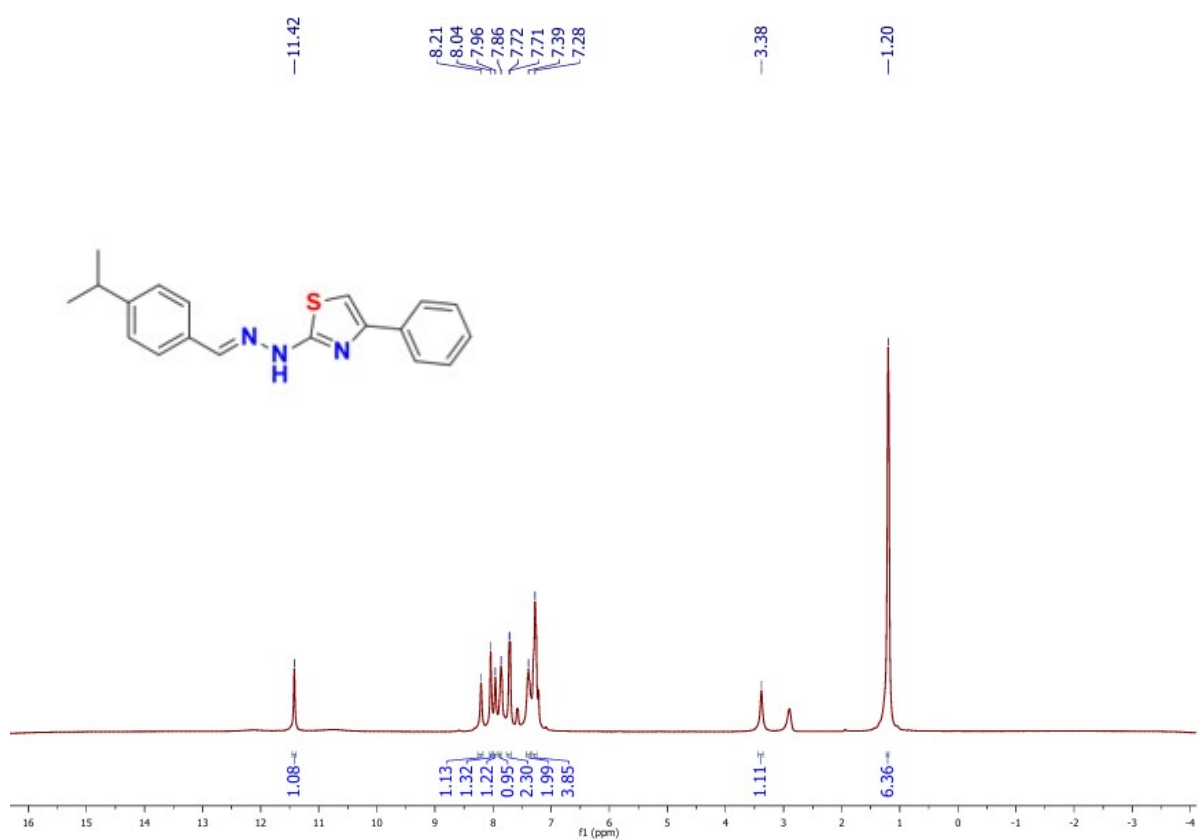

**Figure S11.**  $^1\text{H}$  NMR spectrum of **4d** in DMSO- $\text{d}_6$  (400 MHz, 300 K)

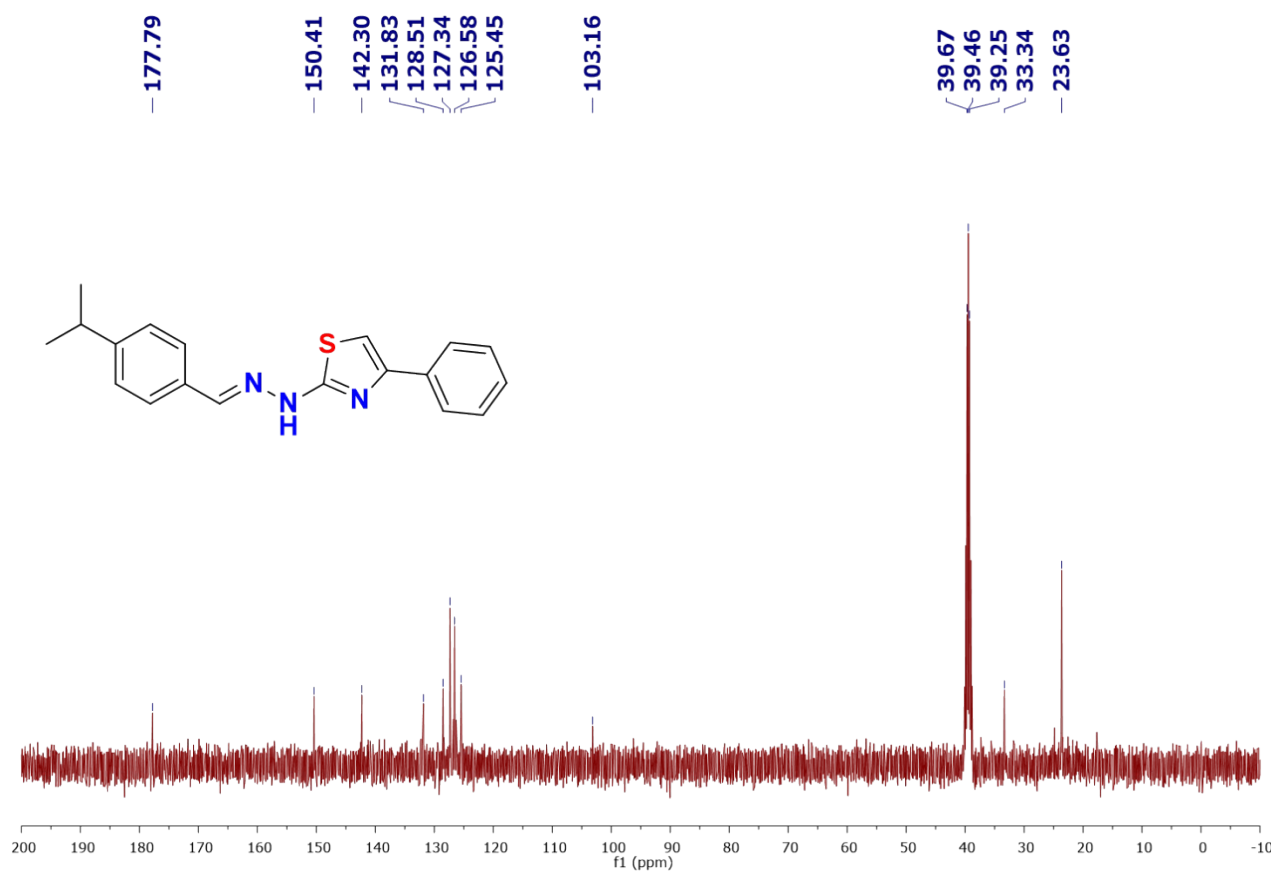

Figure S12.  $^{13}\text{C}\{^1\text{H}\}$  NMR spectrum of 4d in DMSO- $\text{d}_6$  (100 MHz, 300 K)

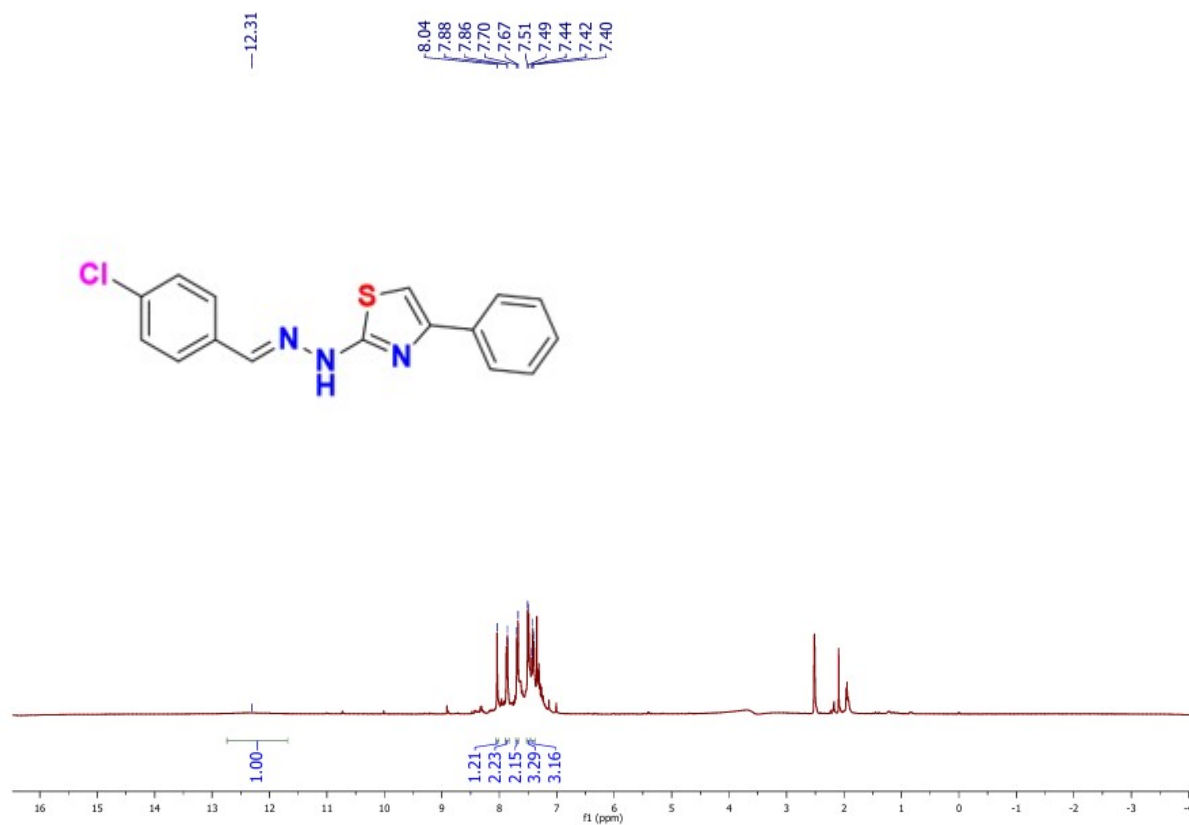

Figure S13.  $^1\text{H}$  NMR spectrum of 4e in DMSO- $\text{d}_6$  (400 MHz, 300 K)

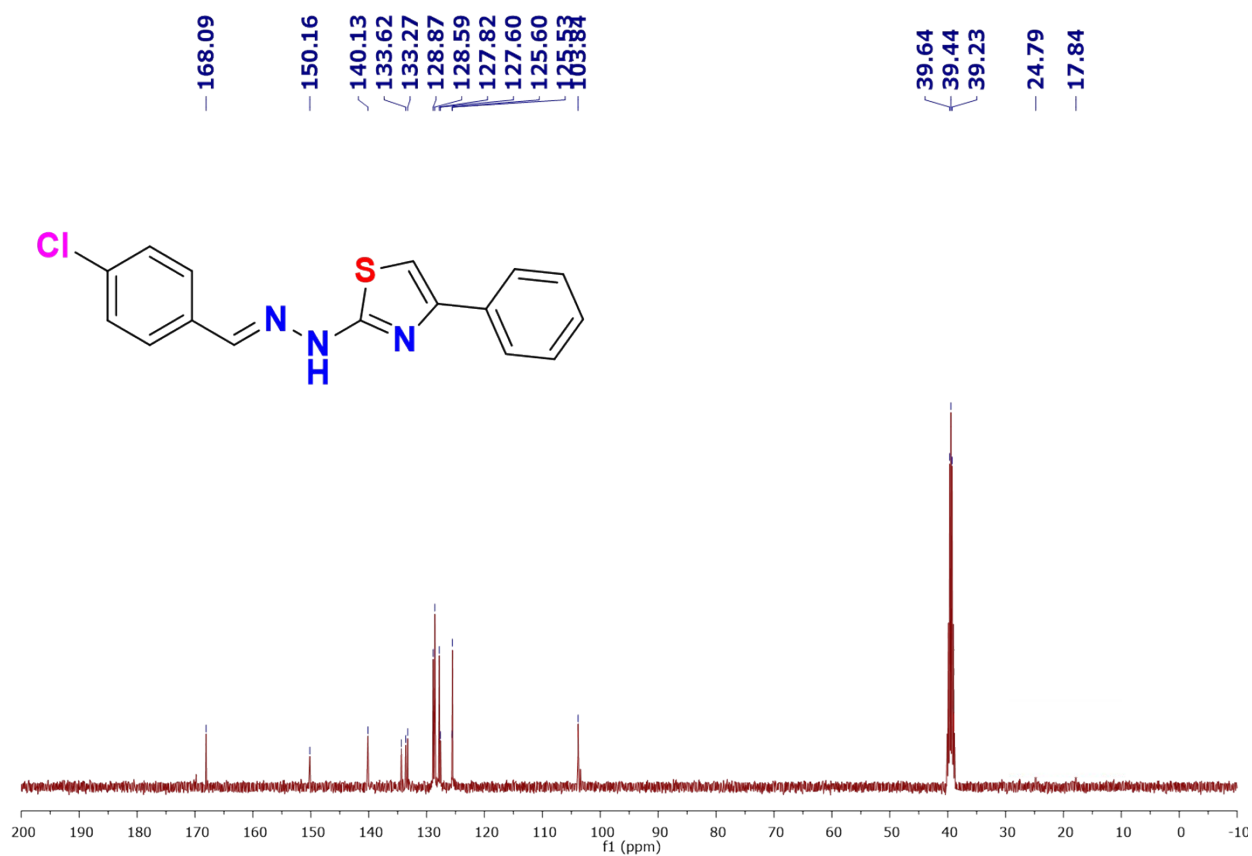

Figure S14.  $^{13}\text{C}\{^1\text{H}\}$  NMR spectrum of **4e** in DMSO- $d_6$  (100 MHz, 300 K)

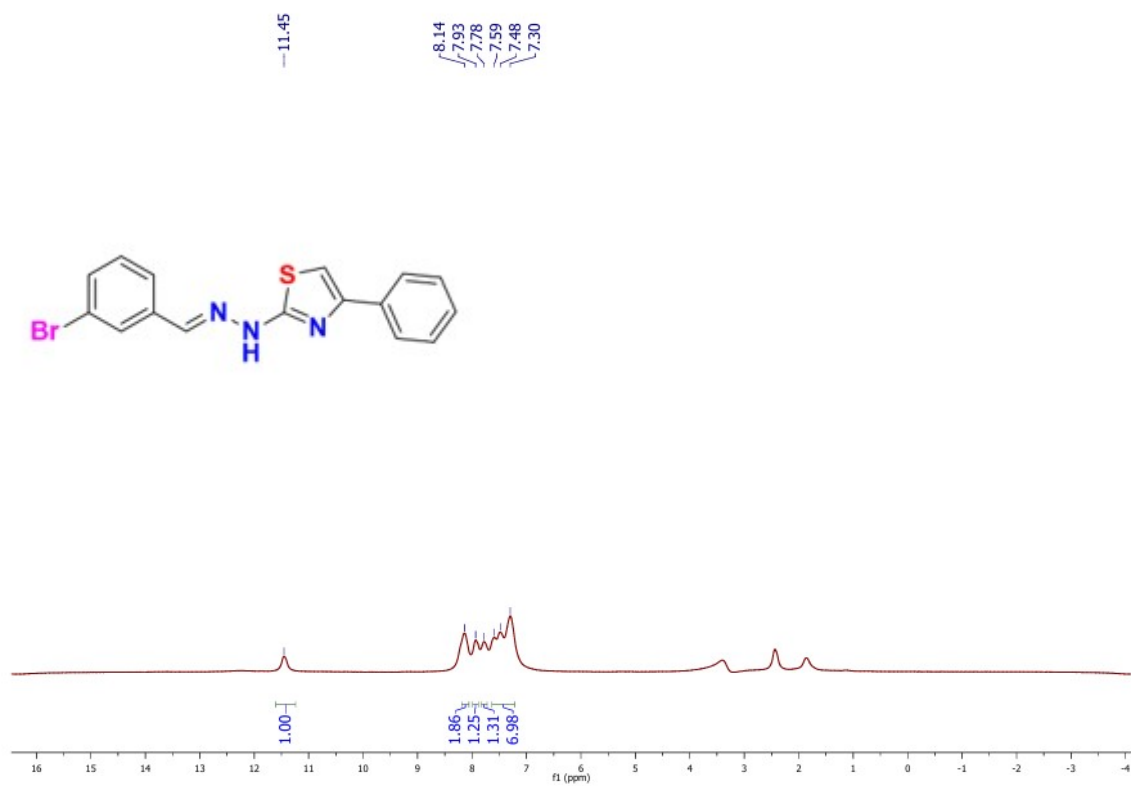

Figure S15.  $^1\text{H}$  NMR spectrum of **4f** in DMSO- $d_6$  (400 MHz, 300 K)

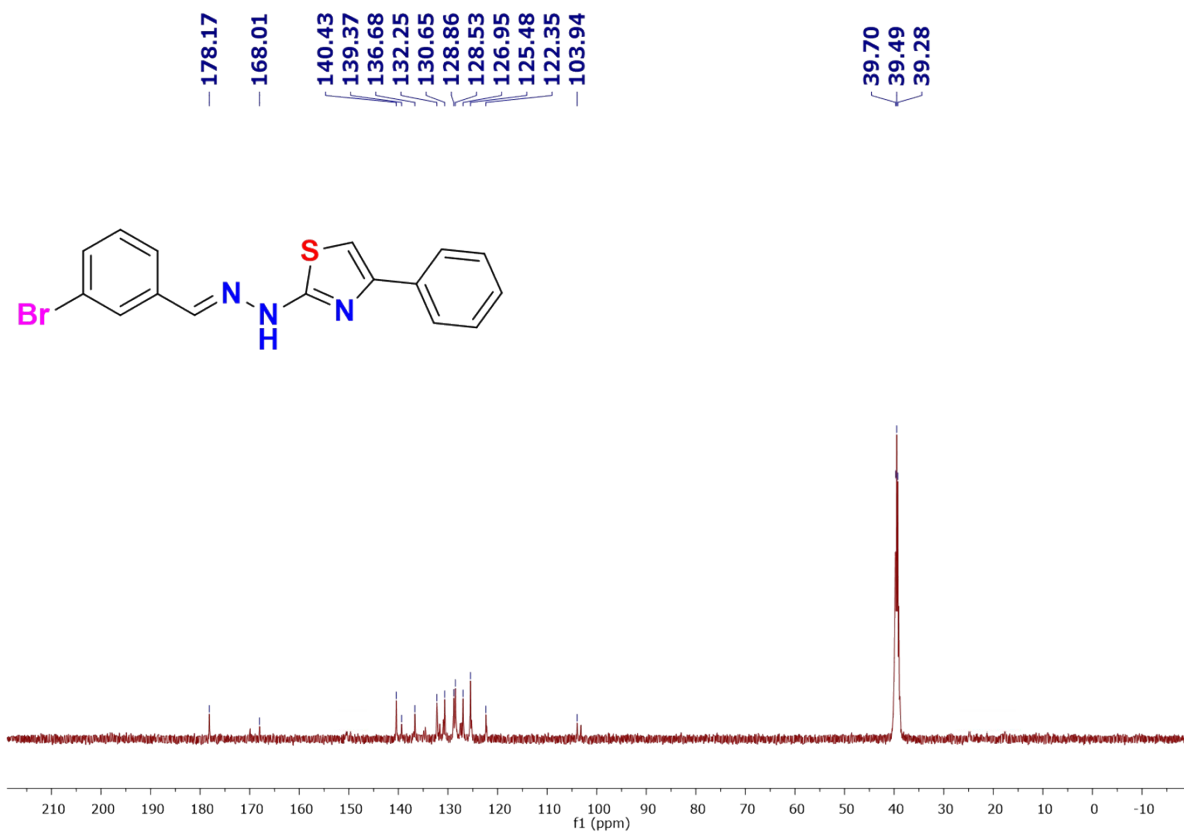

**Figure S16.**  $^{13}\text{C}\{^1\text{H}\}$  NMR spectrum of **4f** in DMSO- $d_6$  (100 MHz, 300 K)

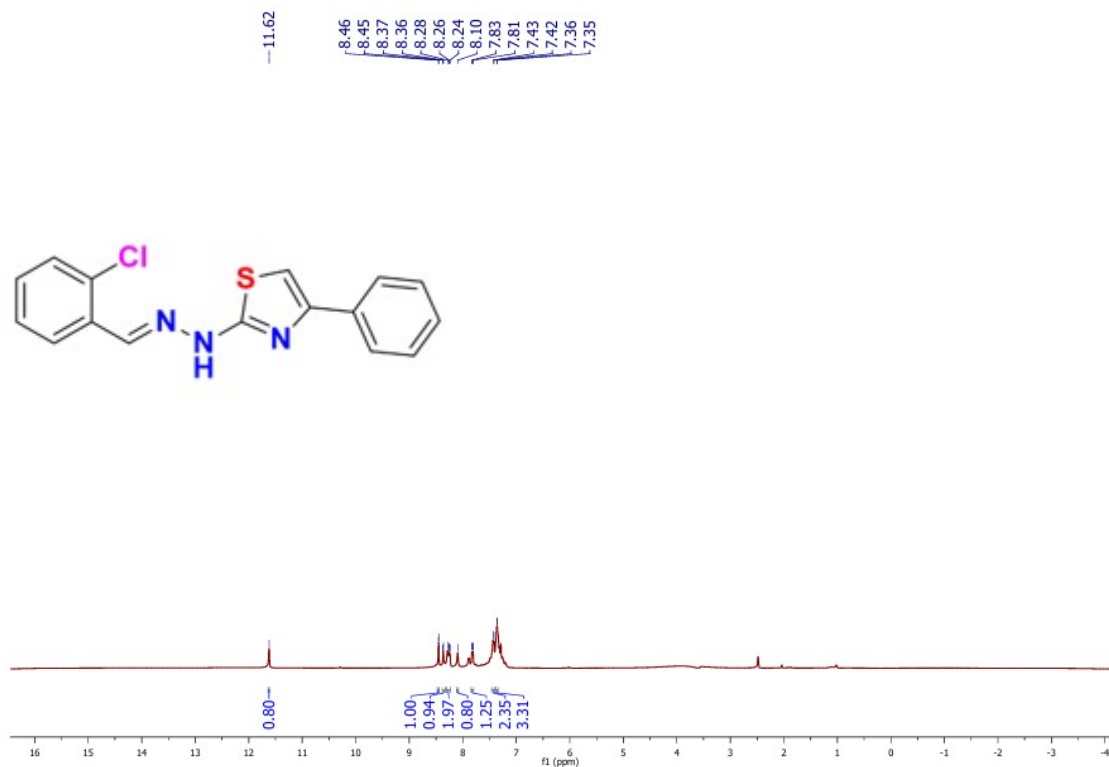

**Figure S17.**  $^1\text{H}$  NMR spectrum of **4g** in DMSO- $d_6$  (400 MHz, 300 K)

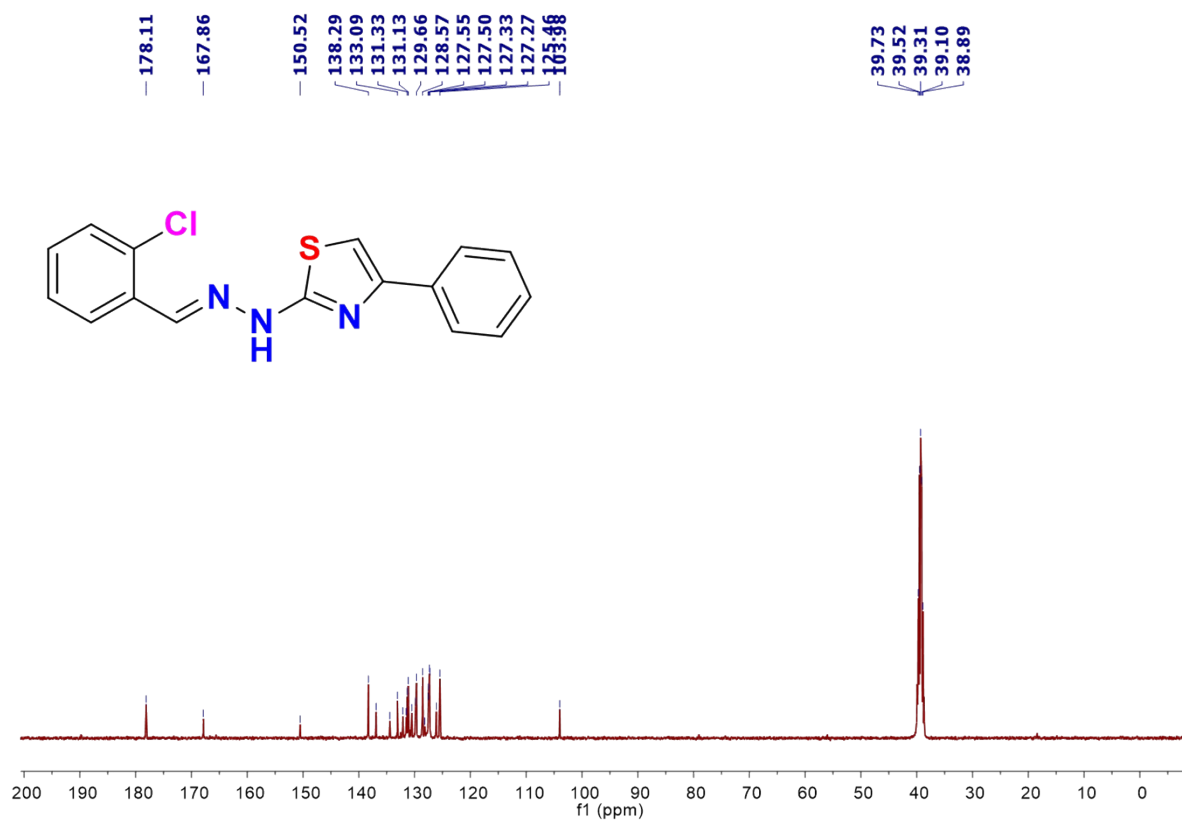

Figure S18.  $^{13}\text{C}\{^1\text{H}\}$  NMR spectrum of 4g in DMSO- $d_6$  (100 MHz, 300 K)

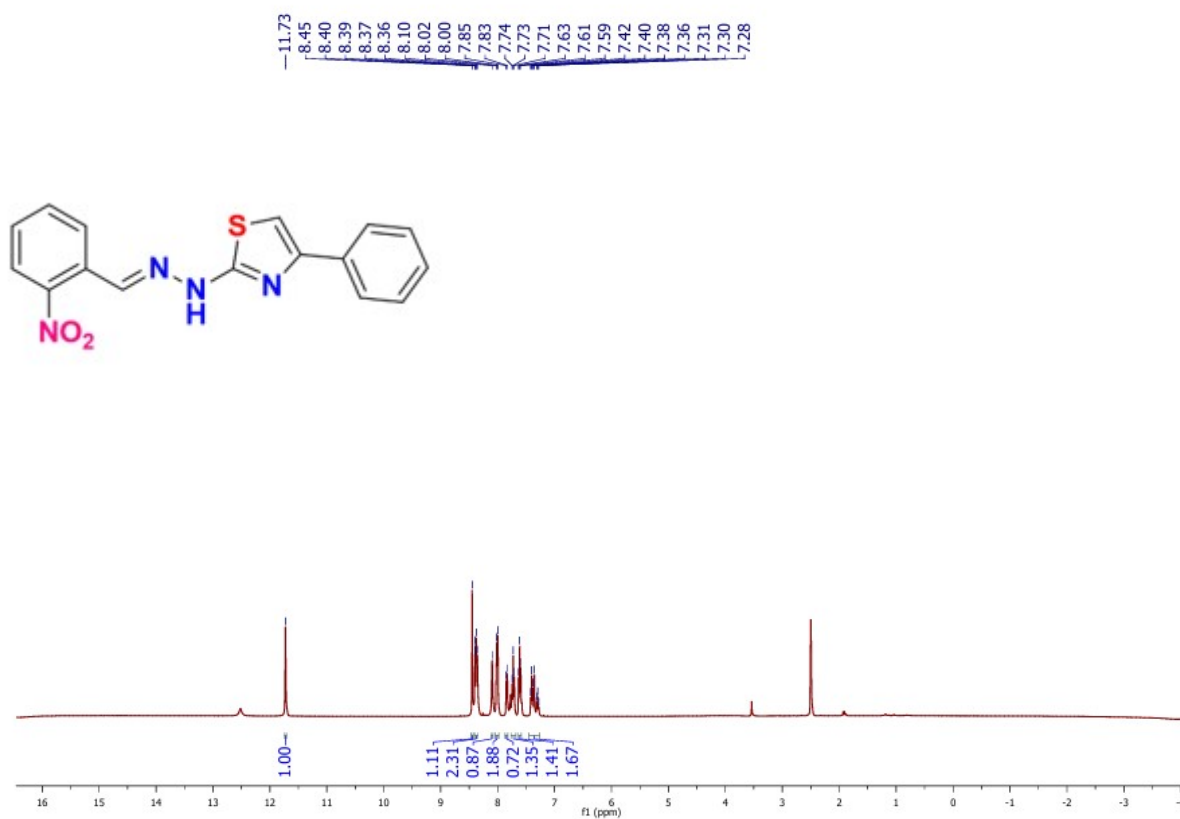

Figure S19.  $^1\text{H}$  NMR spectrum of 4h in DMSO- $d_6$  (400 MHz, 300 K)

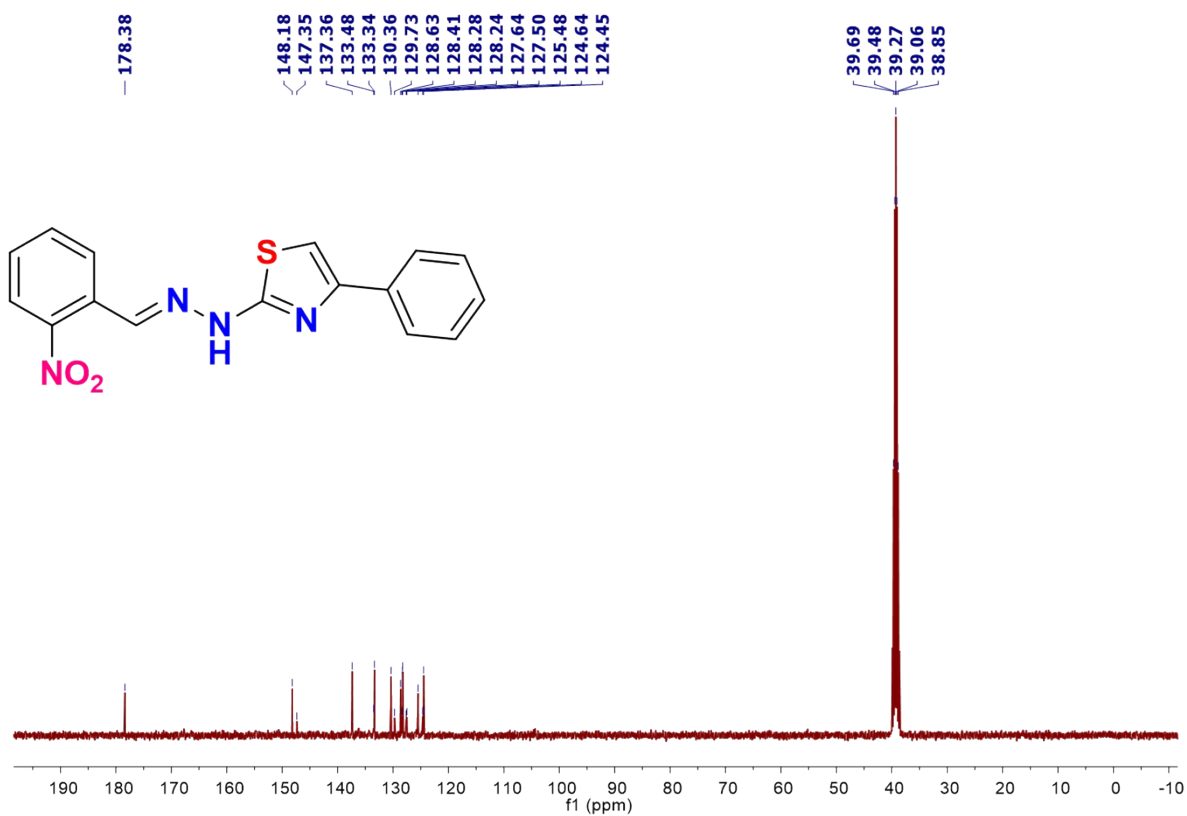

Figure S20.  $^{13}\text{C}\{^1\text{H}\}$  NMR spectrum of **4h** in DMSO- $d_6$  (100 MHz, 300 K)

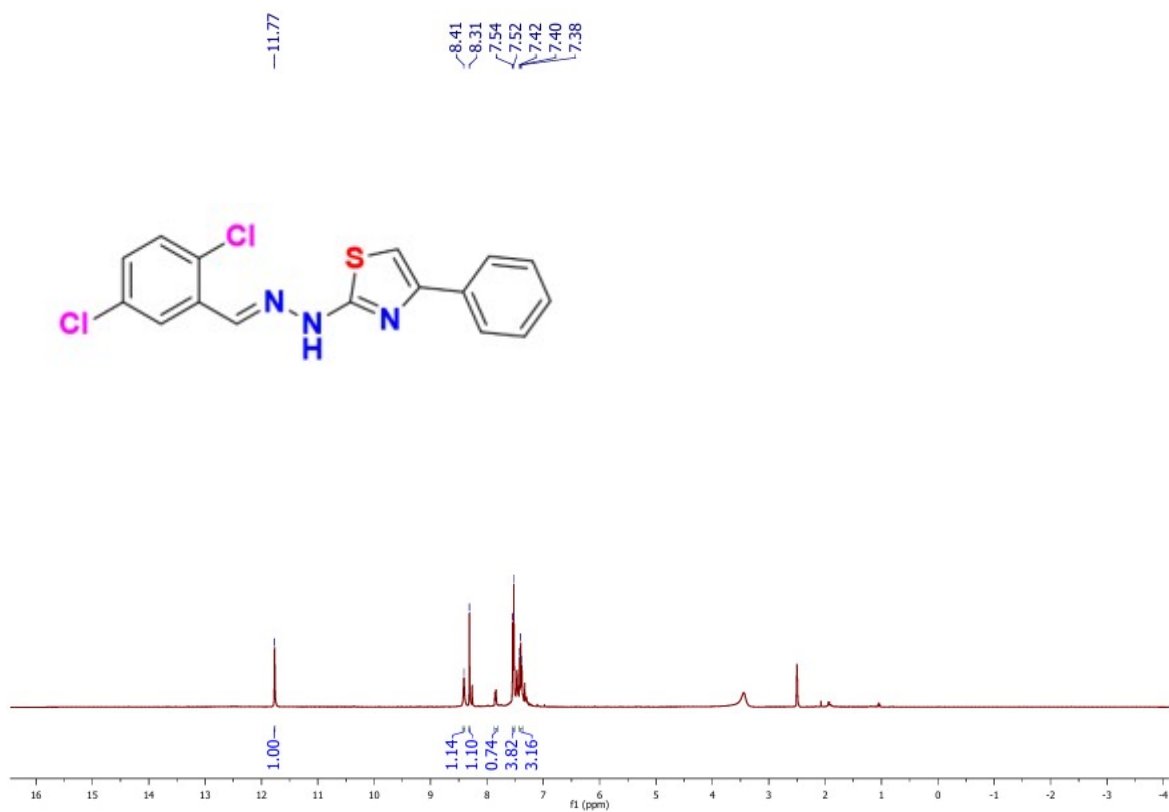

Figure S21.  $^1\text{H}$  NMR spectrum of **4i** in DMSO- $d_6$  (400 MHz, 300 K)

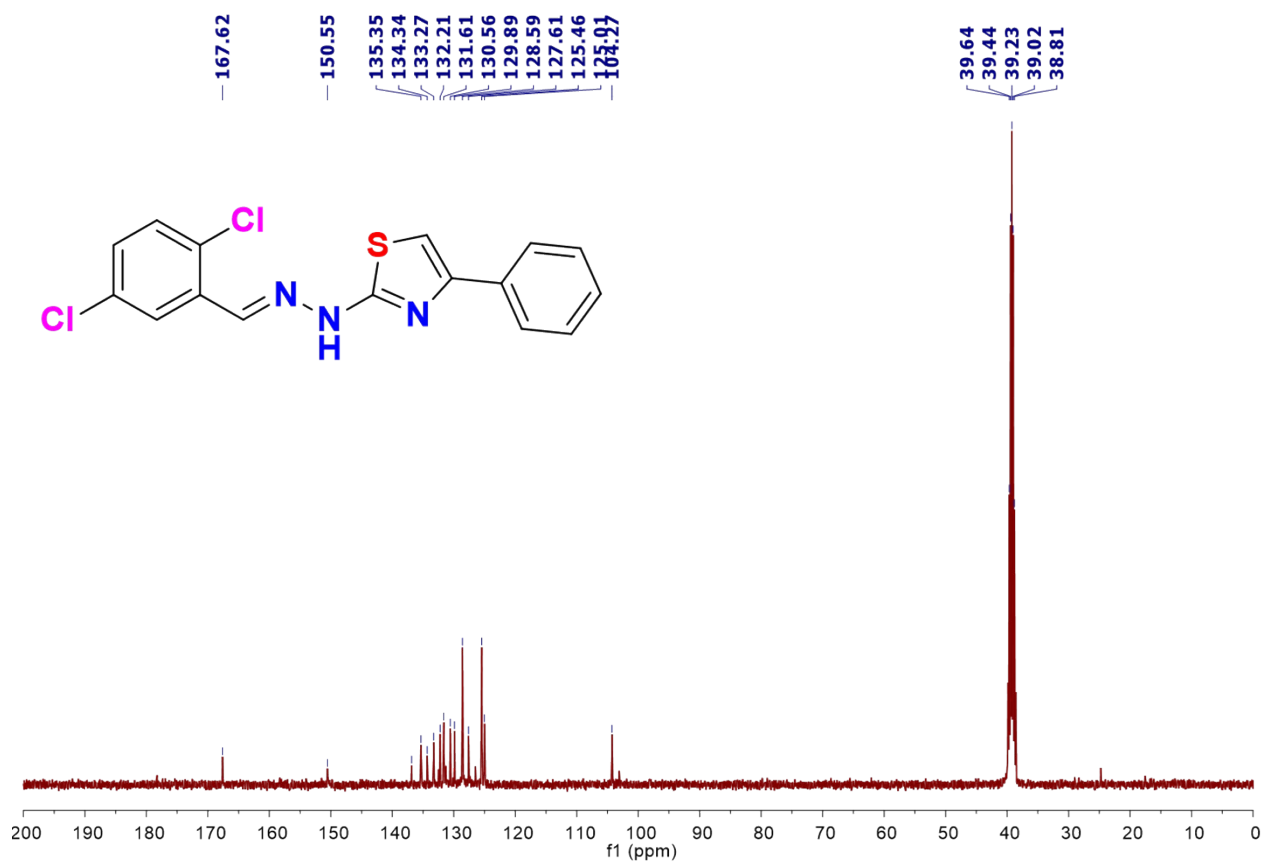

Figure S22.  $^{13}\text{C}\{^1\text{H}\}$  NMR spectrum of **4i** in DMSO- $d_6$  (100 MHz, 300 K)

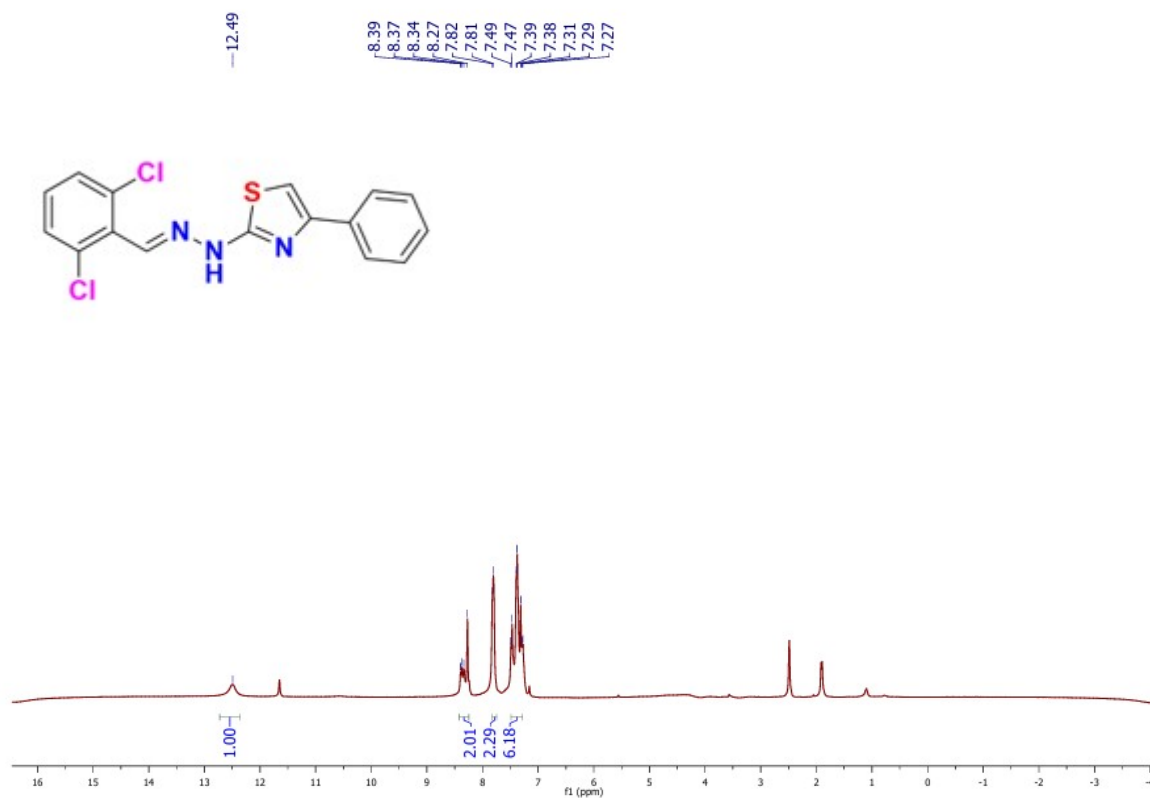

Figure S23.  $^1\text{H}$  NMR spectrum of **4j** in DMSO- $d_6$  (400 MHz, 300 K)

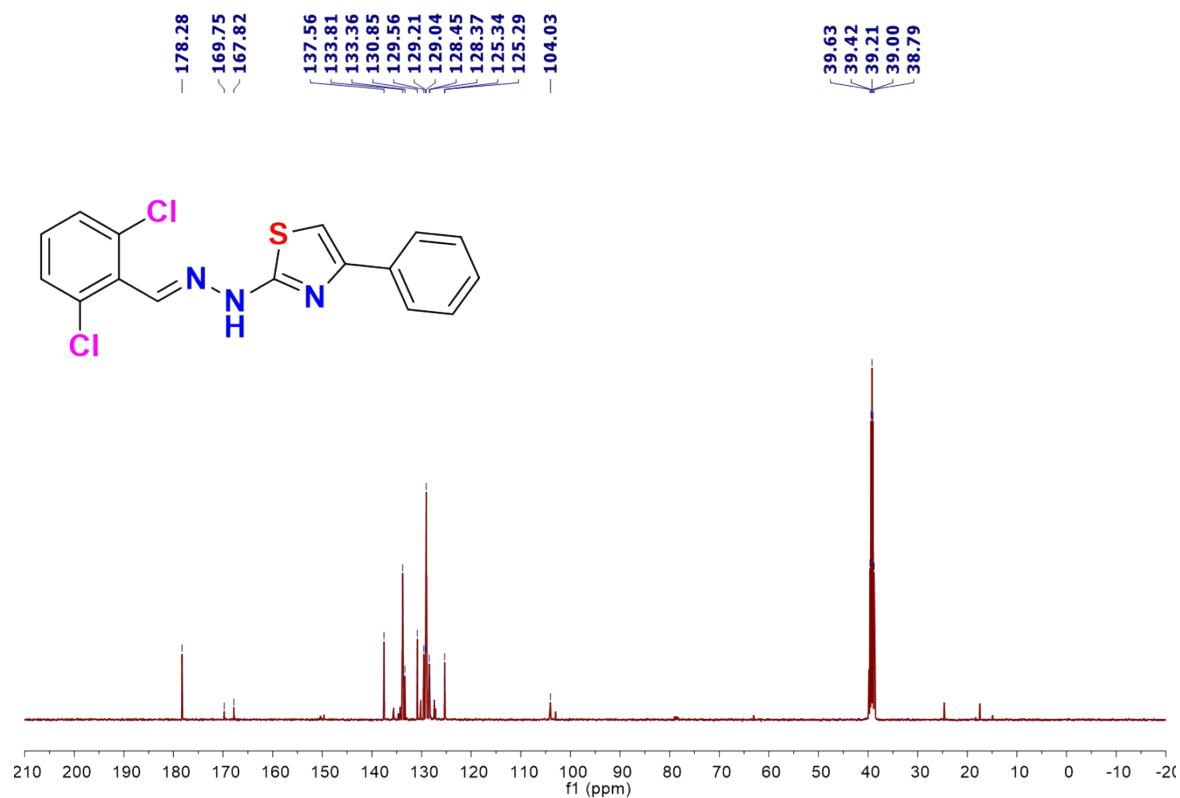

Figure S24.  $^{13}\text{C}\{^1\text{H}\}$  NMR spectrum of **4j** in DMSO- $d_6$  (100 MHz, 300 K)

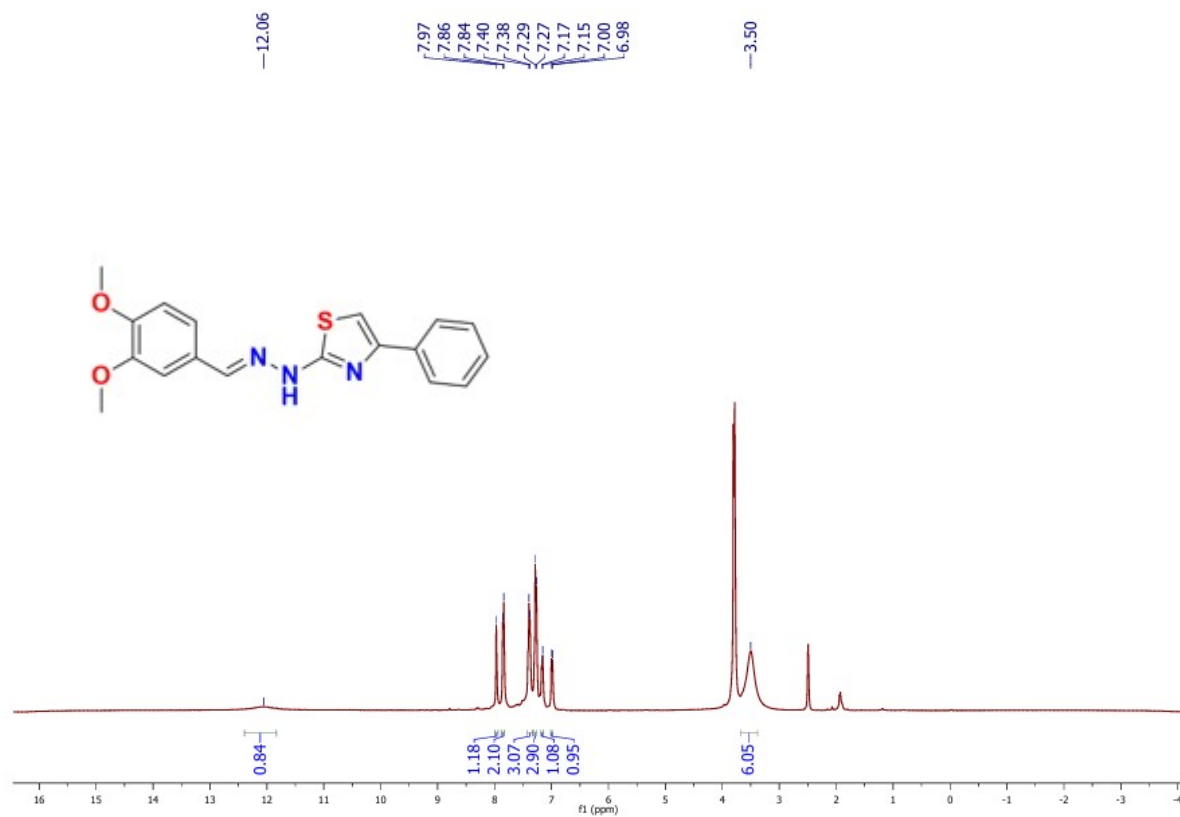

Figure S25.  $^1\text{H}$  NMR spectrum of **4k** in DMSO- $d_6$  (400 MHz, 300 K)

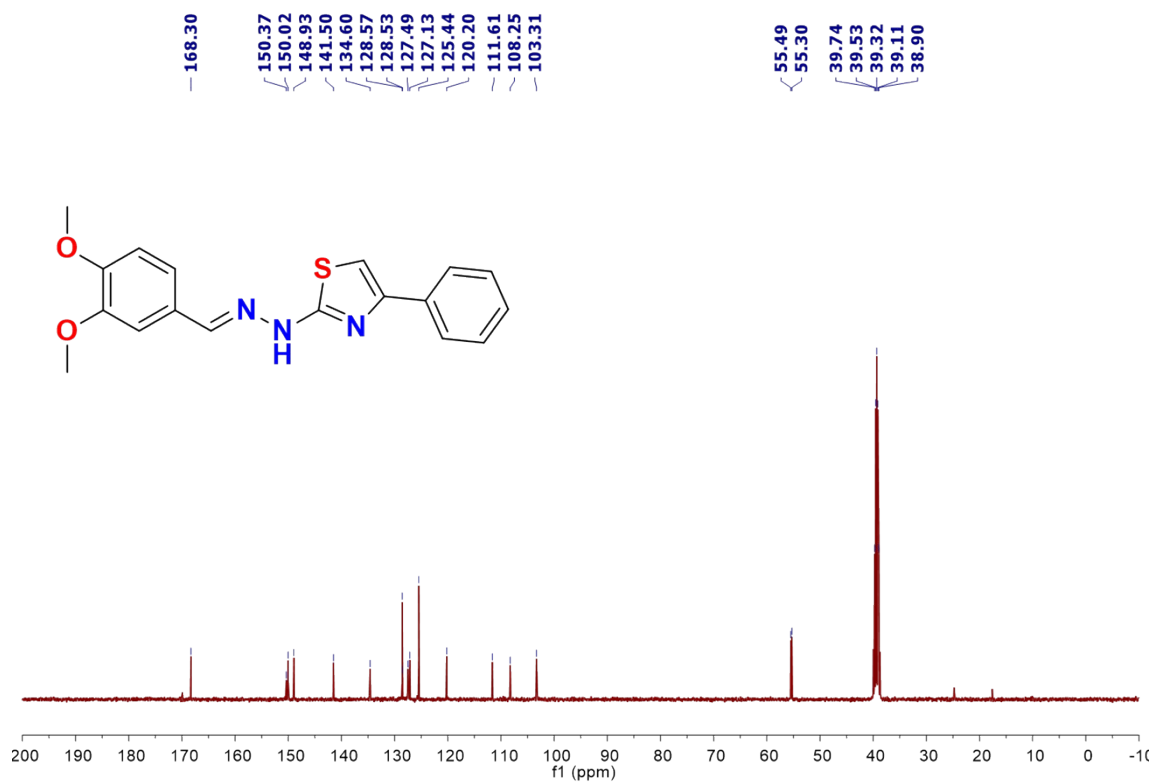

Figure S26.  $^{13}\text{C}\{^1\text{H}\}$  NMR spectrum of **4k** in DMSO- $d_6$  (100 MHz, 300 K)

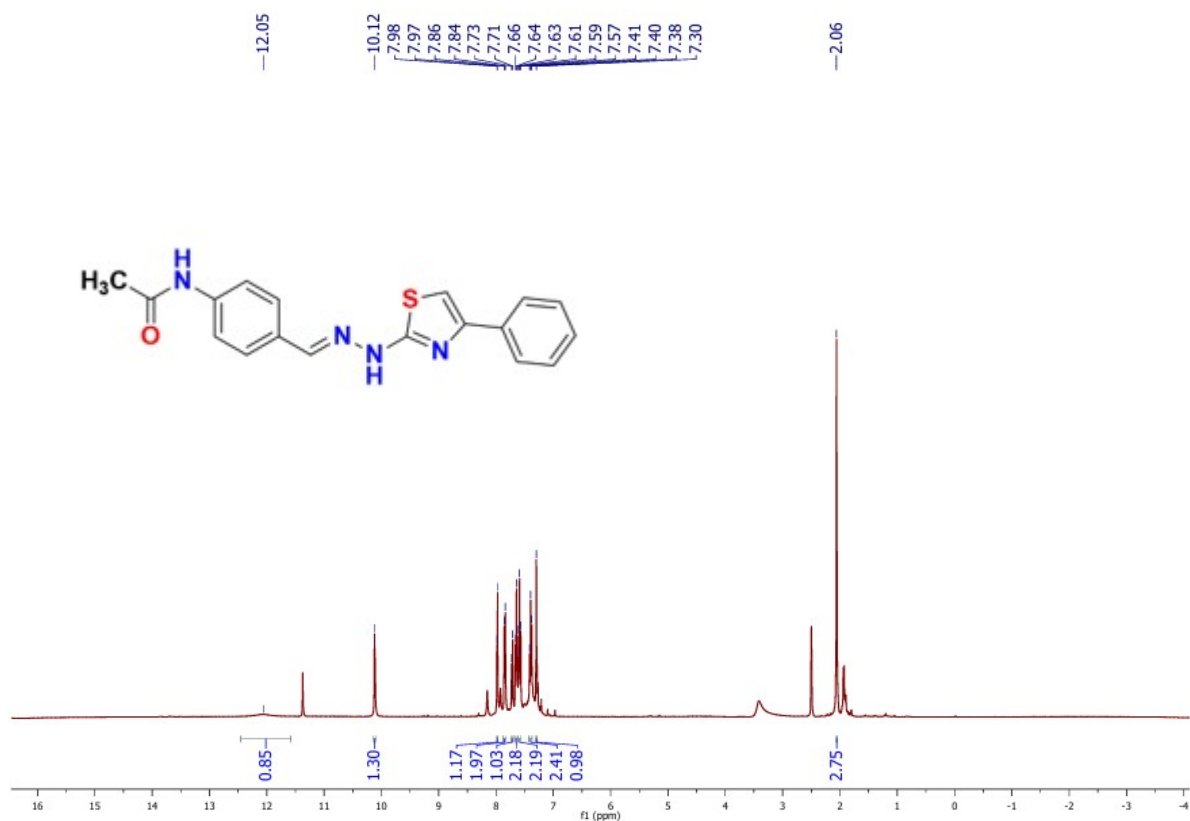

Figure S27.  $^1\text{H}$  NMR spectrum of **4l** in DMSO- $d_6$  (400 MHz, 300 K)

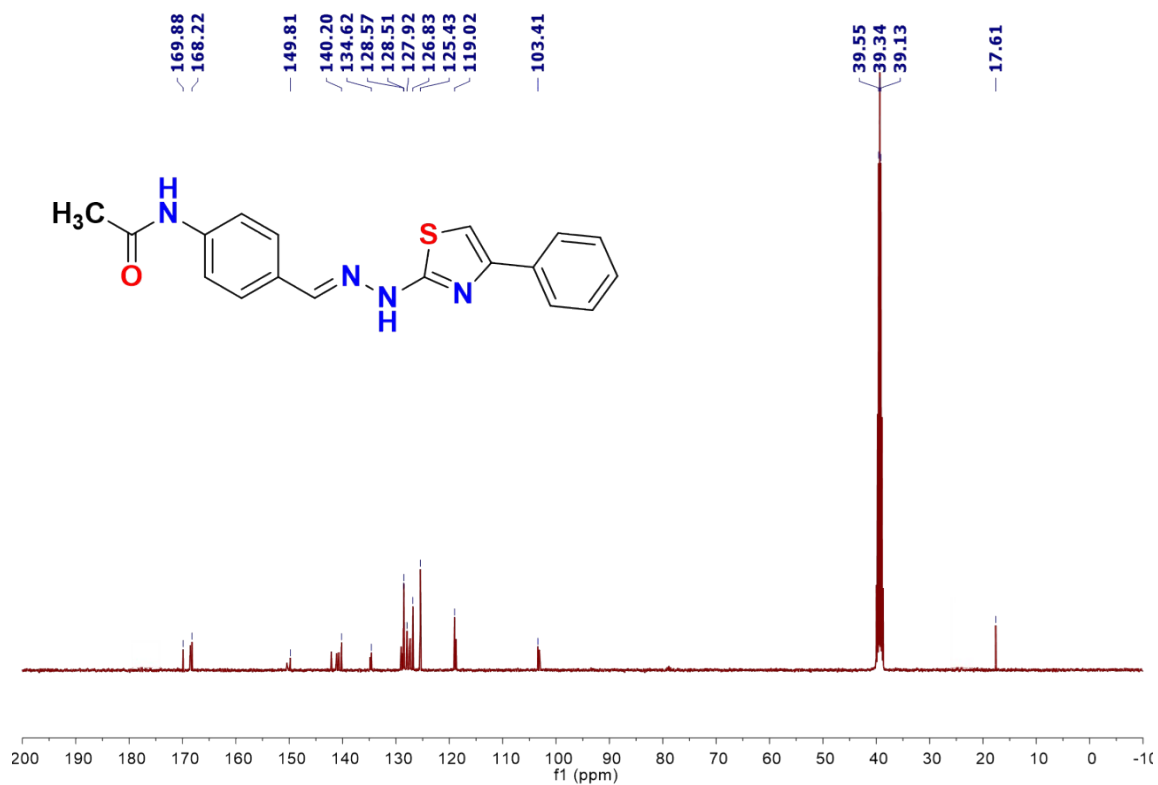

**Figure S28.**  $^{13}\text{C}\{^1\text{H}\}$  NMR spectrum of **4l** in DMSO- $d_6$  (100 MHz, 300 K)

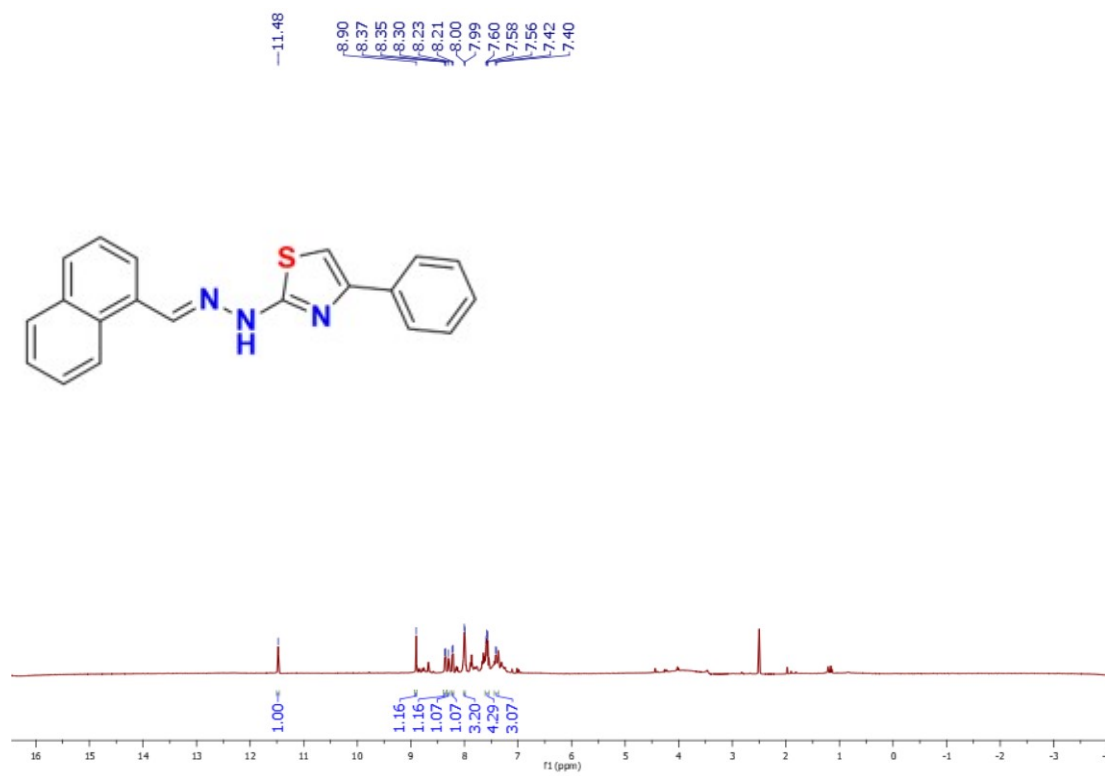

**Figure S29.**  $^1\text{H}$  NMR spectrum of **4m** in DMSO- $d_6$  (400 MHz, 300 K)

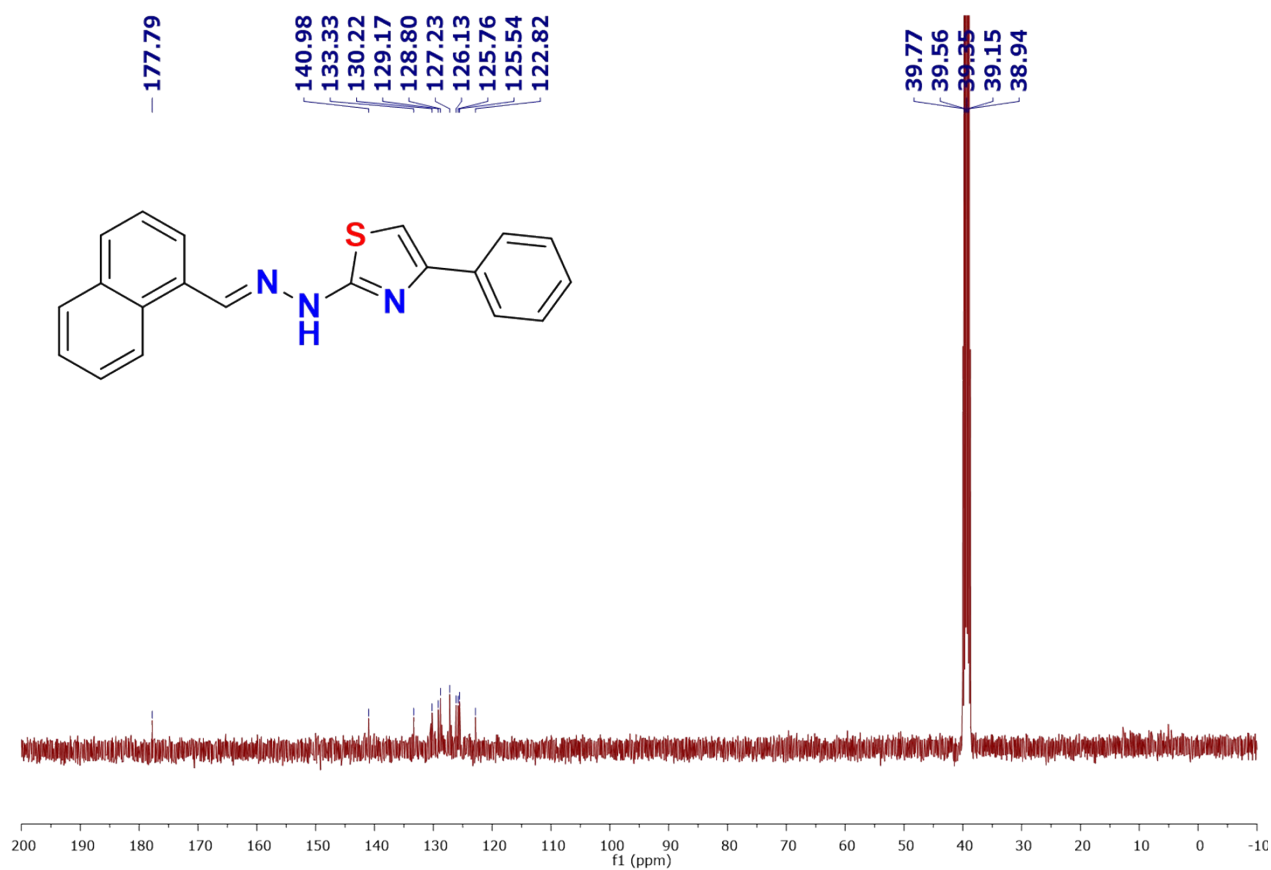

Figure S30.  $^{13}\text{C}\{^1\text{H}\}$  NMR spectrum of **4m** in  $\text{DMSO-d}_6$  (100 MHz, 300 K)

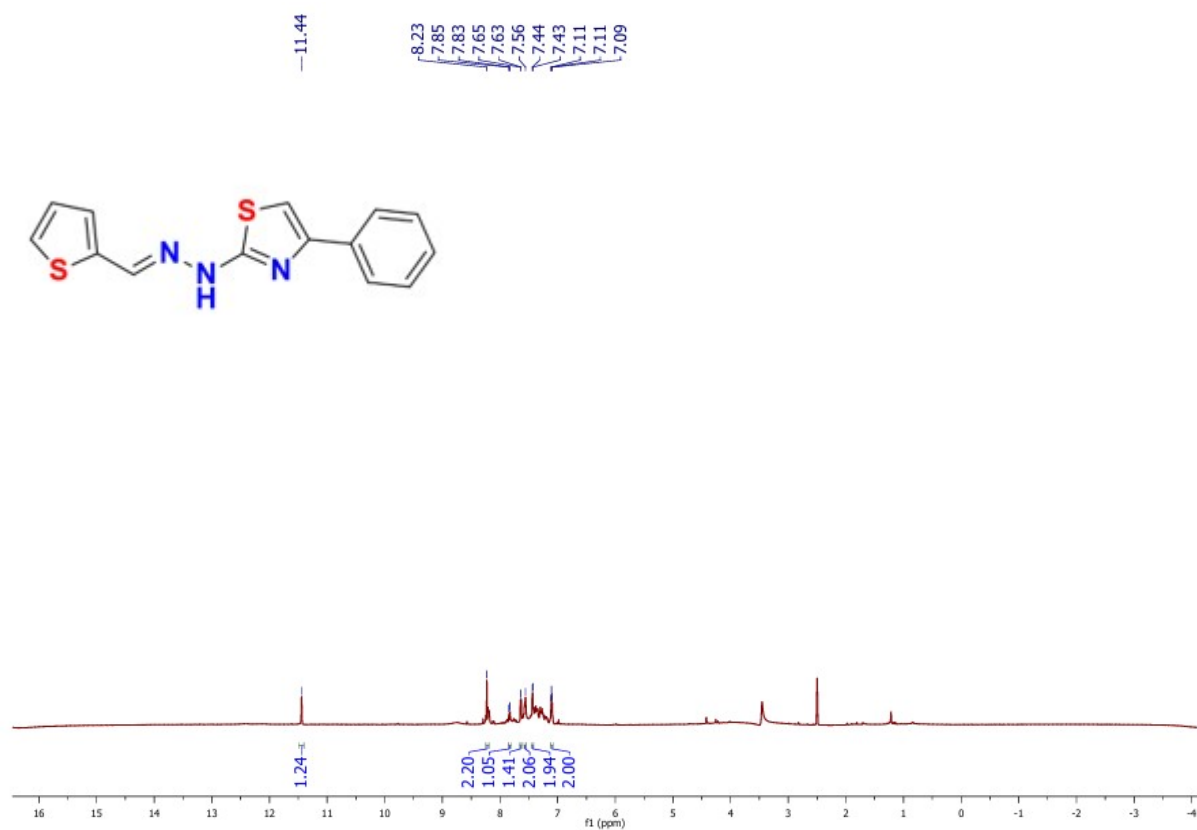

Figure S31.  $^1\text{H}$  NMR spectrum of **4n** in  $\text{DMSO-d}_6$  (400 MHz, 300 K)

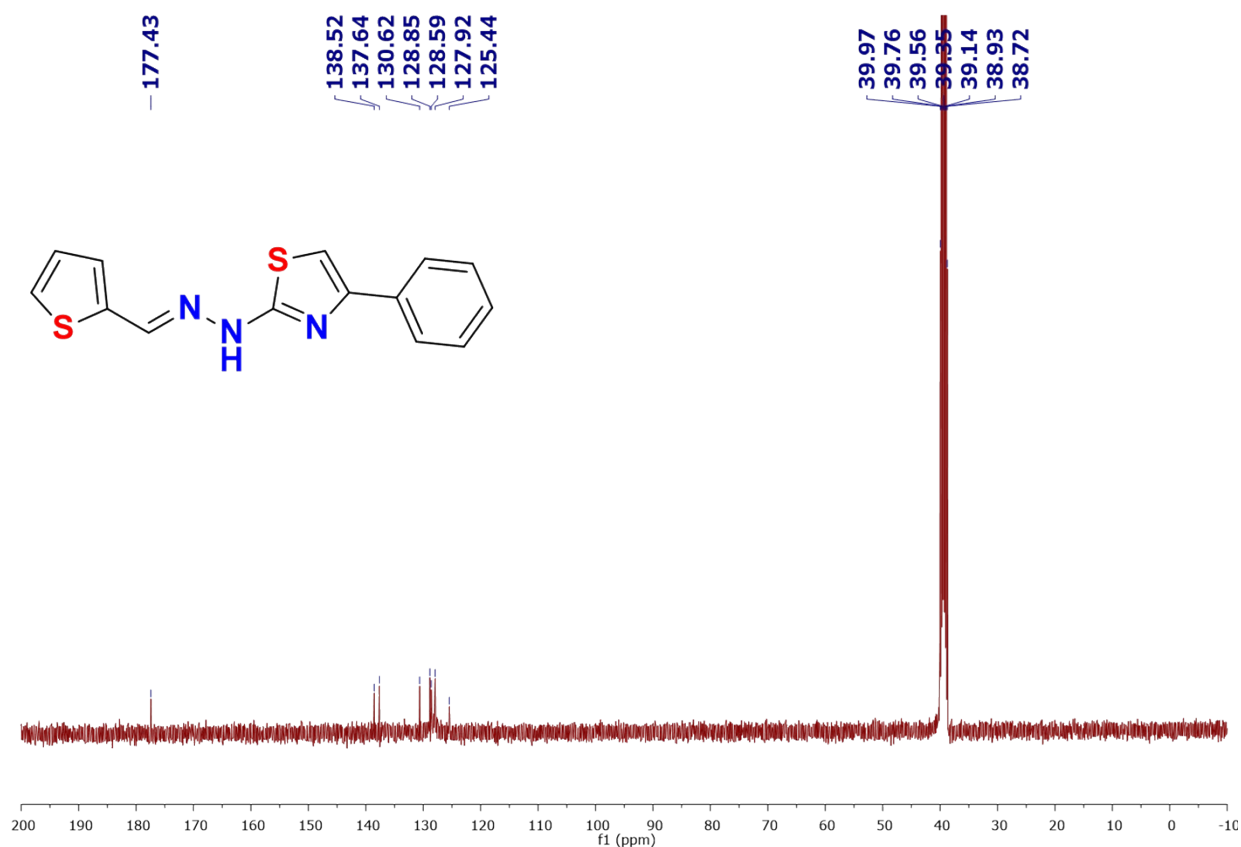

Figure S32.  $^{13}\text{C}\{^1\text{H}\}$  NMR spectrum of **4n** in DMSO- $d_6$  (100 MHz, 300 K)

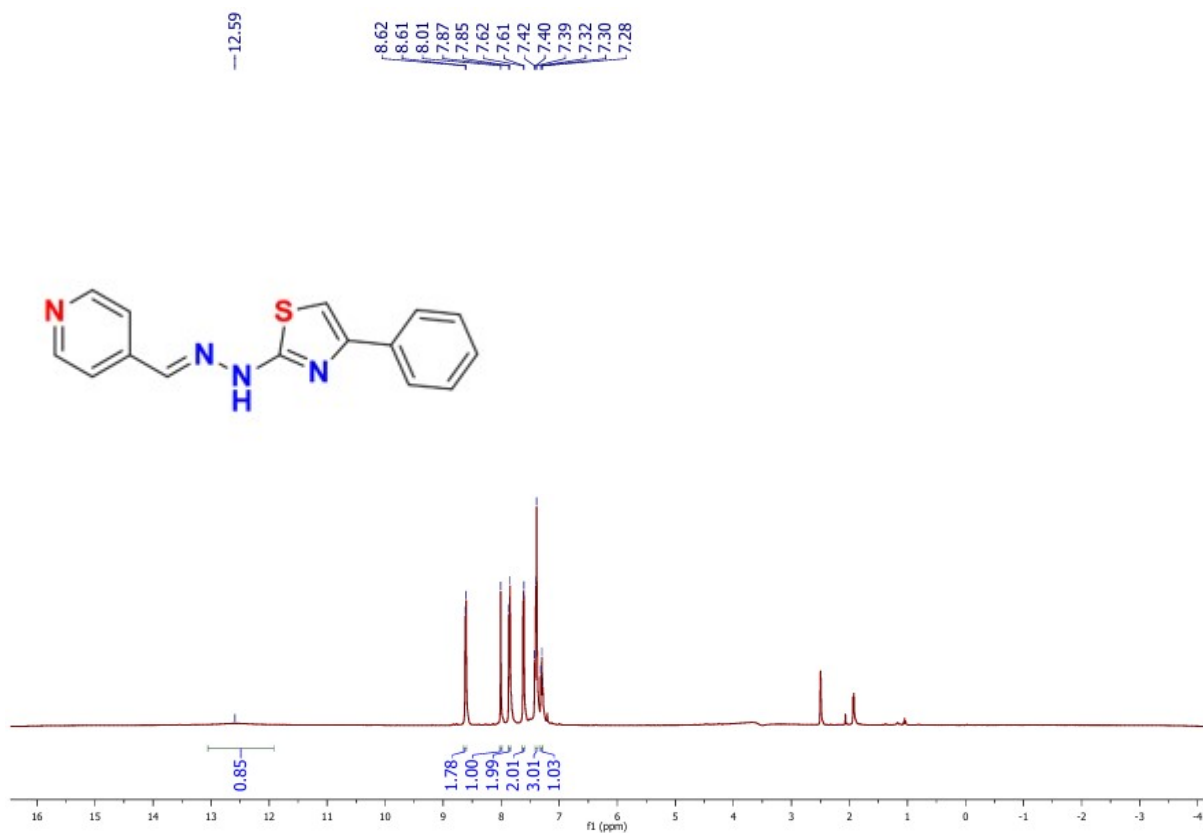

Figure S33.  $^1\text{H}$  NMR spectrum of **4o** in DMSO- $d_6$  (400 MHz, 300 K)

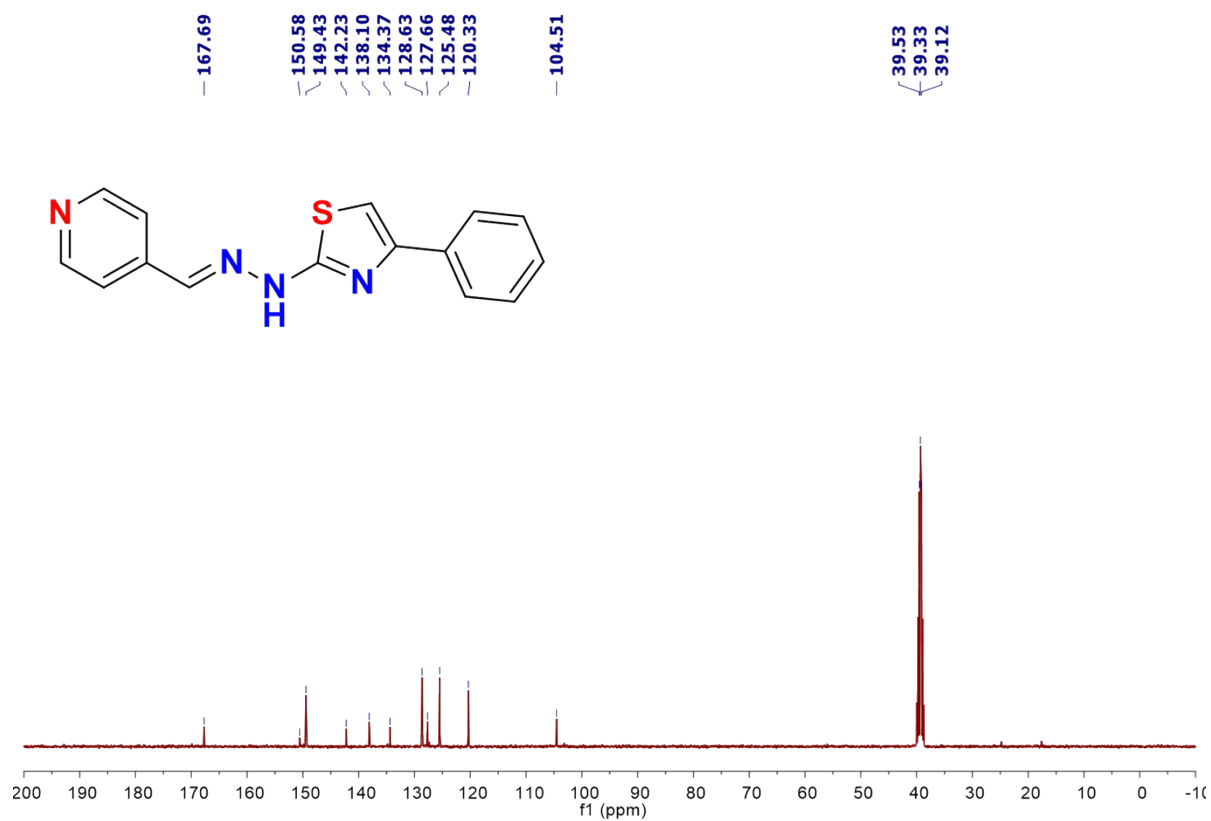

**Figure S34.**  $^{13}\text{C}\{^1\text{H}\}$  NMR spectrum of **4o** in  $\text{DMSO-d}_6$  (100 MHz, 300 K)

## 8. NMR spectra of Intermediates:

### (i) Benzaldehyde (**1a'**)

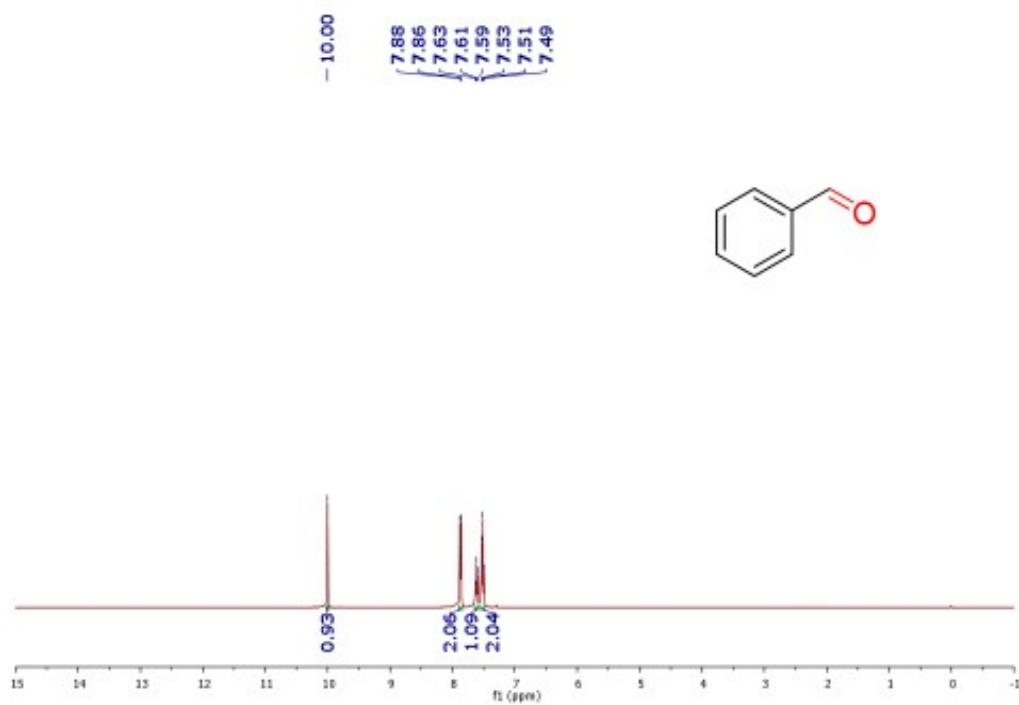

Figure S35.  $^1\text{H}$  NMR spectrum of **1a'** in  $\text{CDCl}_3$  (400 MHz, 300 K)

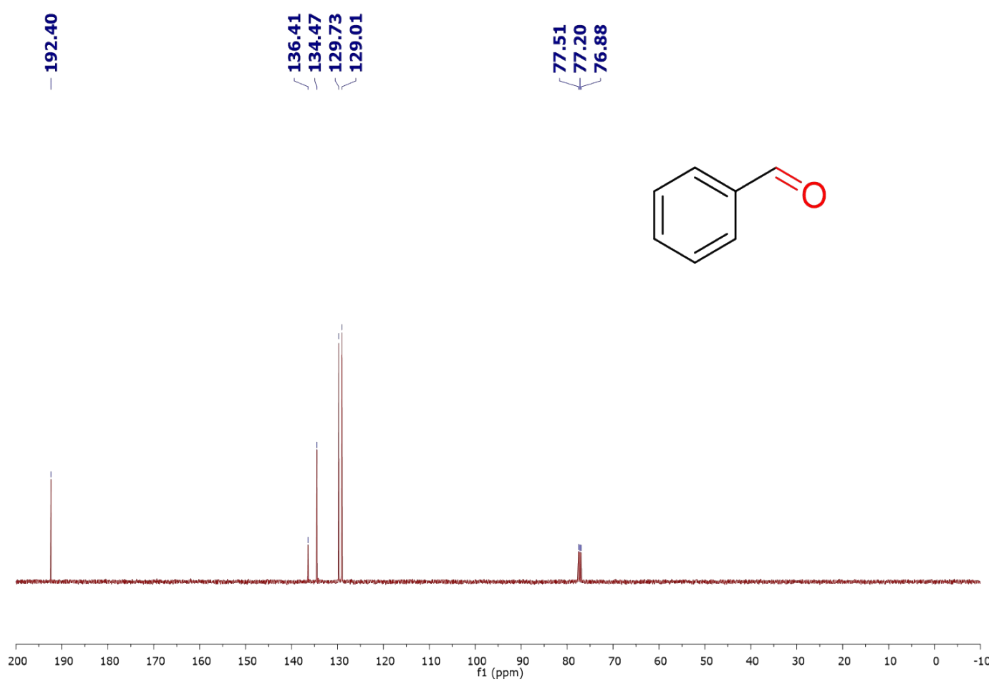

Figure S36.  $^{13}\text{C}\{^1\text{H}\}$  NMR spectrum of **1a'** in  $\text{CDCl}_3$  (100 MHz, 300 K)

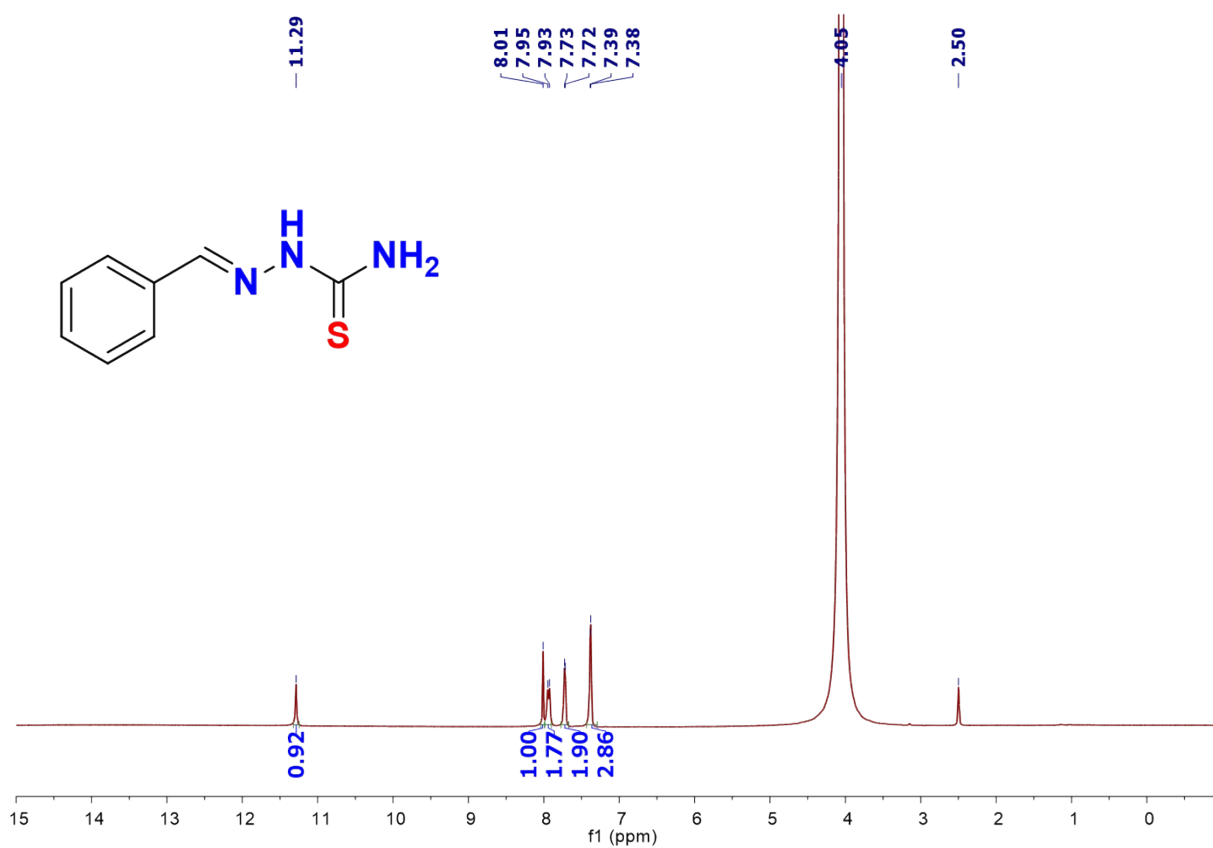

Figure S37.  $^1\text{H}$  NMR spectrum of **1a'** in  $\text{CDCl}_3$  (400 MHz, 300 K)

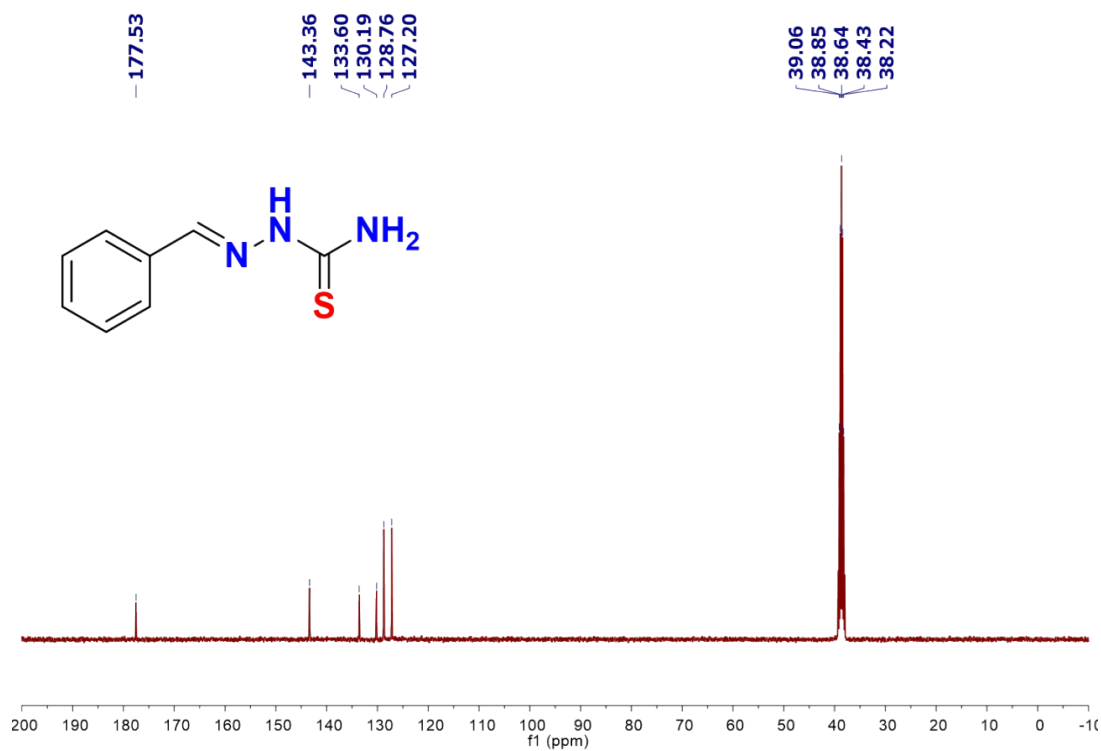

Figure S38.  $^{13}\text{C}\{^1\text{H}\}$  NMR spectrum of 1a' in  $\text{CDCl}_3$  (100 MHz, 300 K)

## 9. HRMS Spectra of new catalytic products

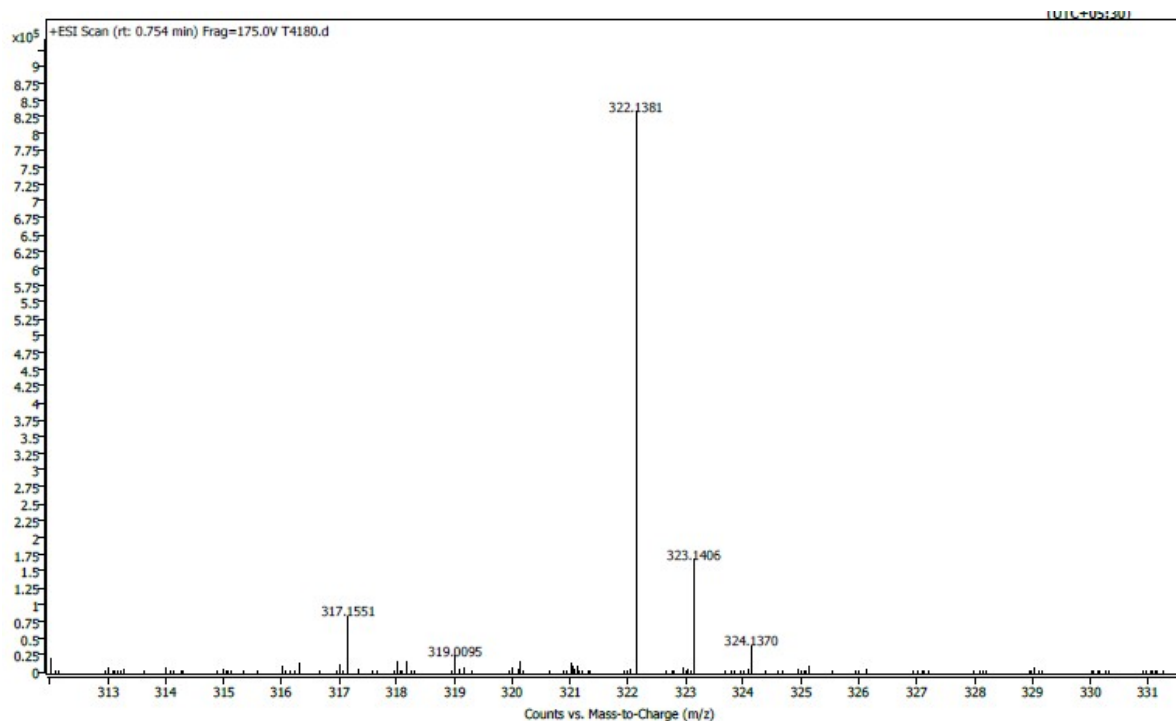

Figure S39. HRMS spectrum of catalytic product 4d ((ESI-TOF)  $m/z$ :  $[\text{M}+\text{H}]^+$  Calcd for  $\text{C}_{19}\text{H}_{19}\text{N}_3\text{S}$  321.1300; Found 322.1381)

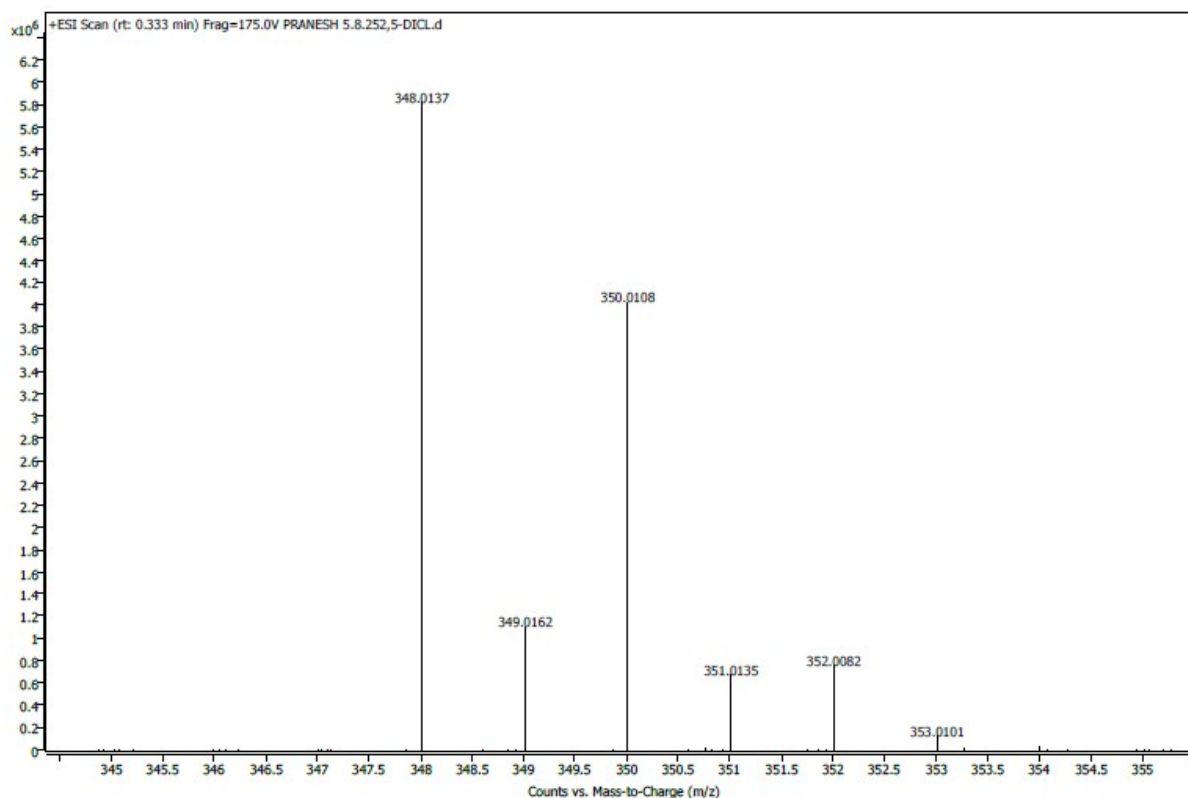

**Figure S40.** HRMS spectrum of catalytic product **4i**((ESI-TOF) m/z: [M+H]<sup>+</sup>Calcd for C<sub>16</sub>H<sub>11</sub>Cl<sub>2</sub>N<sub>3</sub>S 347.0051; Found 348.0137)

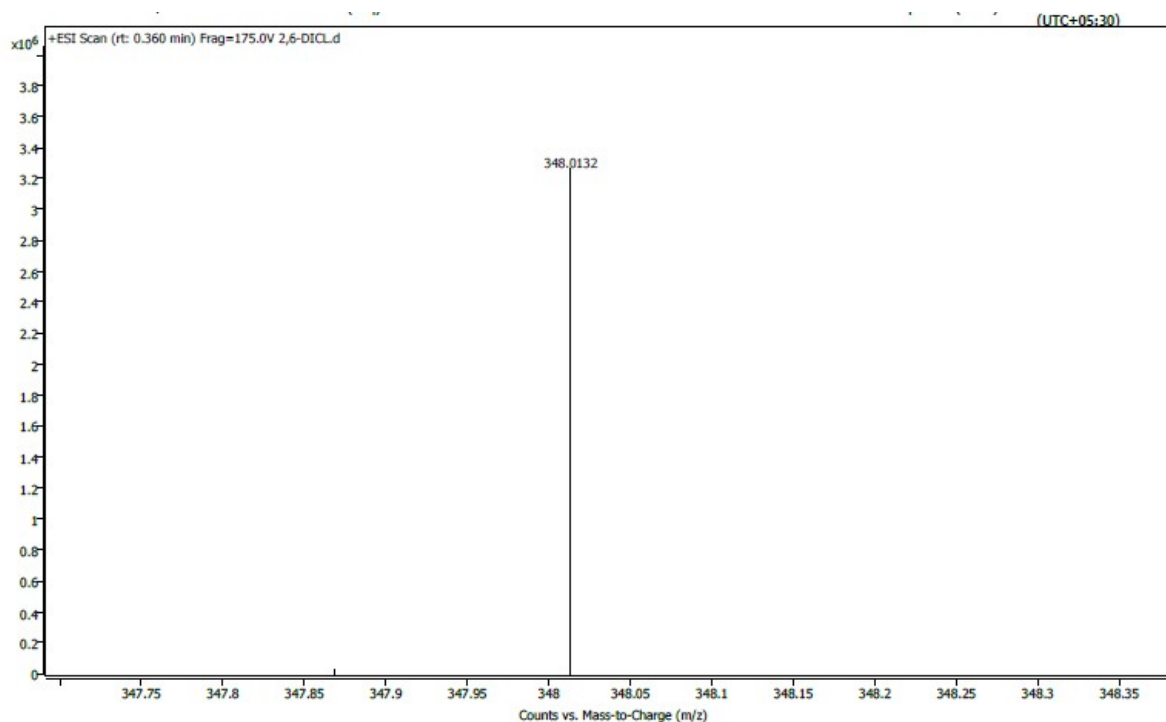

**Figure S41.** HRMS spectrum of catalytic product **4j** ((ESI-TOF) m/z: [M+H]<sup>+</sup>Calcd for C<sub>16</sub>H<sub>11</sub>Cl<sub>2</sub>N<sub>3</sub>S 347.0051; Found 348.0132)

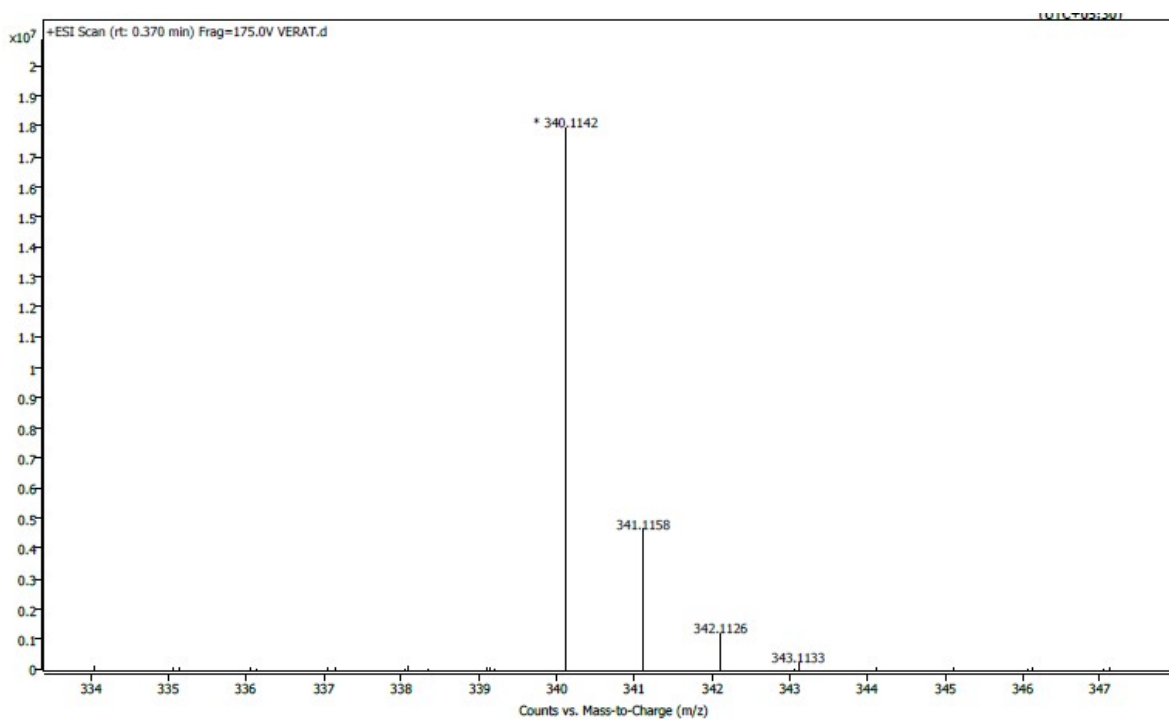

**Figure S42.** HRMS spectrum of catalytic product **4k** ((ESI-TOF) m/z:  $[M+H]^+$  Calcd for  $C_{18}H_{17}N_3O_2S$  339.1041; Found 340.1142)

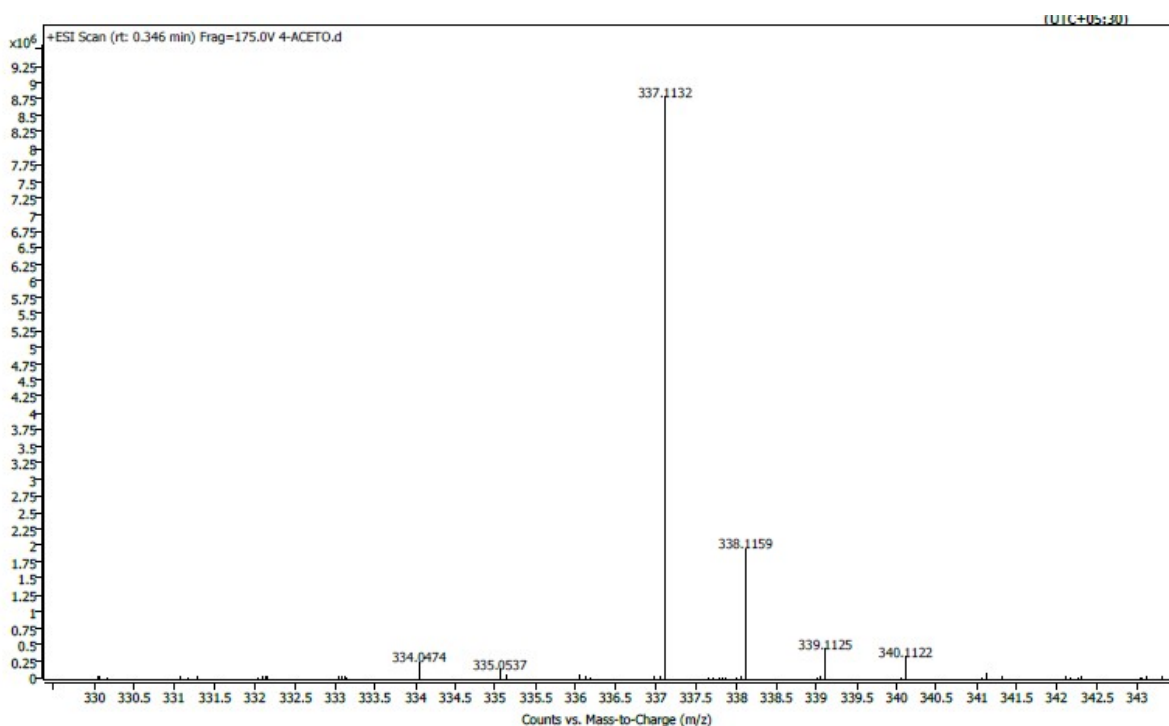

**Figure S43.** HRMS spectrum of catalytic product **4l**((ESI-TOF) m/z:  $[M+H]^+$  Calcd for  $C_{18}H_{16}N_4OS$  336.1045; Found 337.1132)

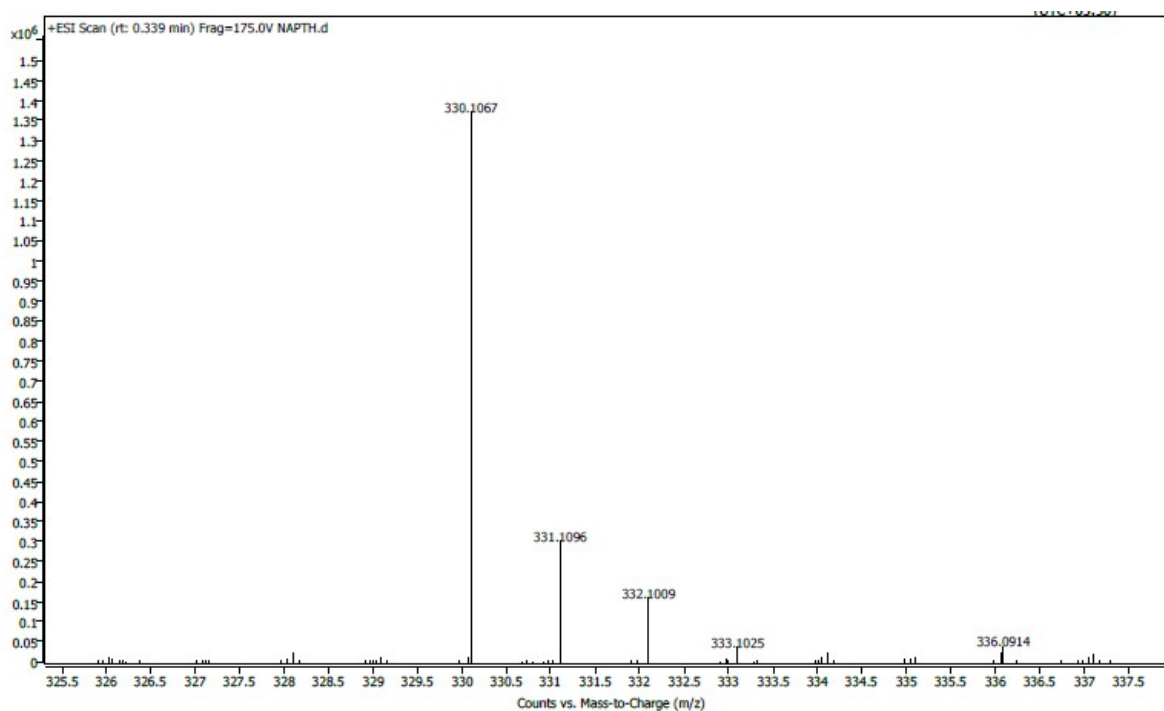

**Figure S44.** HRMS spectrum of catalytic product **4m** ((ESI-TOF)  $m/z$ :  $[M+H]^+$  Calcd for  $C_{20}H_{15}N_3S$  329.0987; Found 330.1065)

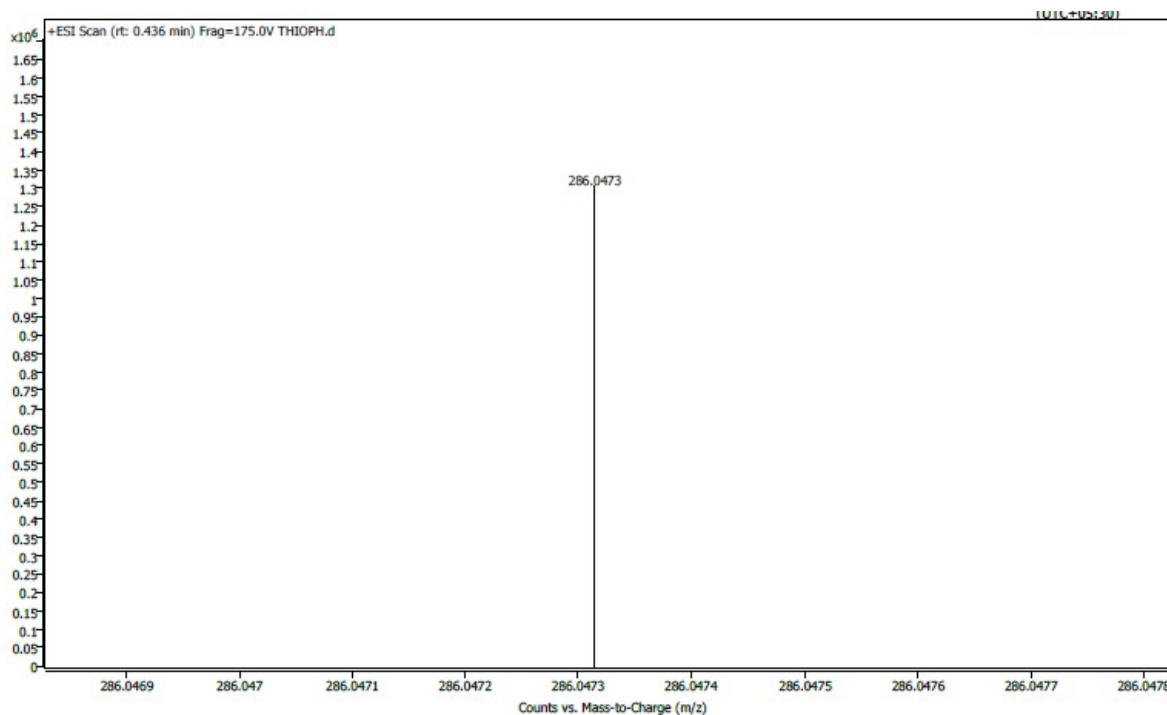

**Figure S45.** HRMS spectrum of catalytic product **4n** ((ESI-TOF)  $m/z$ :  $[M+H]^+$  Calcd for  $C_{14}H_{11}N_3S_2$  285.0394; Found 286.0473)

## 10. Confirmation of hydrogen gas

Under N<sub>2</sub> atmosphere, a mixture of Ru (II) catalyst (4 mol%), *t*-BuOK (0.50 mmol), benzyl alcohol (1.0 mmol), thiosemicarbazide (1.0 mmol) and 2-bromoacetophenone (1.0 mmol) was dissolved in 3 mL of toluene, and the mixture was placed in an oil bath and heated at 110 °C for 4 h. Then, the gaseous reaction mixture has been analyzed on GC-TCD detector to witness the liberation of hydrogen gas. Injection temperature = 50 °C, column temperature = 80 °C, detector temperature (TCD) = 180 °C, carrier gas = He<sub>2</sub>.

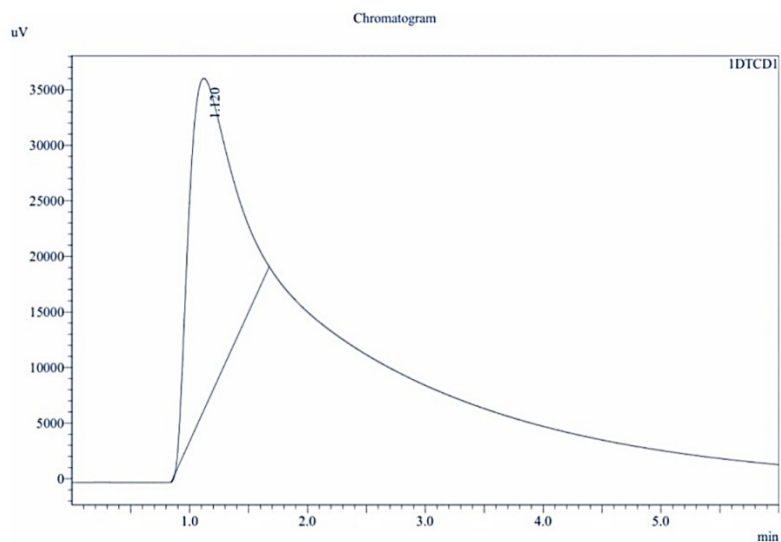

**Figure S46.** Chromatogram of H<sub>2</sub>

## 11. CHARACTERIZATION OF CATALYTIC PRODUCTS

**(E)-2-(2-benzylidenehydrazinyl)-4-phenylthiazole(4a)**<sup>7</sup>: According to the general procedure, the titled compound was synthesized by using 2-bromocaetophenone (199.04 mg, 1.0 mmol), thiosemicarbazide (91.13 mg, 1.0 mmol) and benzyl alcohol (108.14 mg, 1.0 mmol). Column chromatography (SiO<sub>2</sub>-60-120 mesh, Eluent: *n*-hexane: EtOAc = 20:4) as white solid (yield:241.13 mg, 86%). <sup>1</sup>H NMR (400 MHz, DMSO) δ 12.18 (s, 1H), 8.00 (s, 1H), 7.59 (s, 1H), 7.28 (t, 10H). <sup>13</sup>C NMR (100 MHz, DMSO) δ 165.7, 141.3, 134.2, 133.8, 128.8, 128.4, 128.2, 127.8, 127.4, 127.1, 125.9, 125.1, 103.3. TON= 21.5, TOF=1.79 h<sup>-1</sup>

**(E)-2-(2-(4-methoxybenzylidene)hydrazinyl)-4-phenylthiazole (4b)**<sup>7</sup>: According to the general procedure, the titled compound was synthesized by using 2-bromocaetophenone (199.04 mg, 1.0 mmol), thiosemicarbazide (91.13 mg, 1.0 mmol) and 4-Methoxybenzyl alcohol (138.16 mg, 1.0 mmol). Column chromatography (SiO<sub>2</sub>-60-120 mesh, Eluent: *n*-hexane: EtOAc = 20:4) as white solid (yield:287.07 mg, 92%). <sup>1</sup>H NMR (400 MHz, DMSO) δ 12.06 (s, 1H), 8.01 (s, 1H), 7.86 (d, *J* = 7.3 Hz, 1H), 7.61 (d, *J* = 16.6, 8.2 Hz, 2H), 7.40 (t, *J* = 7.1 Hz, 2H), 7.31 (d, *J* = 10.5 Hz, 2H), 7.22 (t, 1H), 6.99 (t, 3H), 3.79 (d, *J* = 7.3 Hz, 3H). <sup>13</sup>C NMR (100 MHz, DMSO) δ 168.3, 166.0, 160.2, 150.3, 141.3, 134.6, 128.5, 128.2, 127.7, 127.4, 126.9, 125.4, 114.3, 103.3, 55.2. TON= 23, TOF=1.91 h<sup>-1</sup>

**(E)-2-(2-(4-methylbenzylidene)hydrazinyl)-4-phenylthiazole (4c)**<sup>7</sup>: According to the general procedure, the titled compound was synthesized by using 2-bromocaetophenone (199.04 mg, 1.0 mmol), thiosemicarbazide (91.13 mg, 1.0 mmol) and 4-Methylbenzyl alcohol (122.17 mg, 1.0 mmol). Column chromatography (SiO<sub>2</sub>-60-120 mesh, Eluent: *n*-hexane: EtOAc = 20:4) as white solid (yield:264.24 mg, 90%). <sup>1</sup>H NMR (400 MHz, DMSO) δ 12.13 (s, 1H), 8.00 (s, 1H), 7.83 (d, *J* = 7.6 Hz, 2H), 7.54 (d, *J* = 7.4 Hz, 2H), 7.39 (s, 2H), 7.29 (s, 2H), 7.23 (s, 2H), 2.30 (s, 3H). <sup>13</sup>C NMR (100 MHz, DMSO) δ 168.3, 149.5, 142.1, 139.1, 134.1, 131.5, 129.4, 128.5, 127.6, 126.3, 125.5, 103.6, 20.9. TON= 22.5, TOF=1.87 h<sup>-1</sup>

**(E)-2-(2-(4-isopropylbenzylidene)hydrazinyl)-4-phenylthiazole (4d)**: According to the general procedure, the titled compound was synthesized by using 2-bromocaetophenone (199.04 mg, 1.0 mmol), thiosemicarbazide (91.13 mg, 1.0 mmol) and 4-isopropylbenzyl alcohol (150.22 mg, 1.0 mmol). Column chromatography (SiO<sub>2</sub>-60-120 mesh, Eluent: *n*-hexane: EtOAc = 20:4) as white solid (yield:288.09 mg, 89%). <sup>1</sup>H NMR (400 MHz, DMSO) δ 11.42 (s, 1H), 8.21 (s, 1H), 8.04 (s, 1H), 7.96 (s, 1H), 7.86 (s, 1H), 7.72 (d, *J* = 6.4 Hz, 2H),

7.39 (s, 2H), 7.28 (s, 4H), 3.38 (s, 1H), 1.20 (s, 6H). <sup>13</sup>C NMR (100 MHz, DMSO) δ 177.7, 150.4, 142.3, 131.8, 128.5, 127.3, 126.5, 125.4, 103.1, 33.3, 23.6. (ESI-TOF) m/z: [M+H]<sup>+</sup> Calcd for C<sub>19</sub>H<sub>19</sub>N<sub>3</sub>S 321.1300; Found 322.1381. TON= 22.2, TOF=1.85 h<sup>-1</sup>

**(E)-2-(2-(4-chlorobenzylidene)hydrazinyl)-4-phenylthiazole (4e)**<sup>7</sup>: According to the general procedure, the titled compound was synthesized by using 2-bromocetophenone (199.04 mg, 1.0 mmol), thiosemicarbazide (91.13 mg, 1.0 mmol) and 4-chlorobenzyl alcohol (142.58 mg, 1.0 mmol). Column chromatography (SiO<sub>2</sub>-60-120 mesh, Eluent: *n*-hexane: EtOAc = 20:4) as white solid (yield: 268.09 mg, 84%). <sup>1</sup>H NMR (400 MHz, DMSO) δ 12.31 (s, 1H), 8.04 (s, 1H), 7.87 (d, *J* = 8.2 Hz, 2H), 7.69 (d, *J* = 6.4 Hz, 2H), 7.50 (d, *J* = 6.4 Hz, 3H), 7.42 (t, 3H). <sup>13</sup>C NMR (100 MHz, DMSO) δ 168.0, 150.1, 140.1, 134.3, 133.6, 133.2, 128.8, 128.5, 127.8, 127.6, 125.6, 125.5, 103.8.

**(E)-2-(2-(3-bromobenzylidene)hydrazinyl)-4-phenylthiazole (4f)**<sup>8</sup>: According to the general procedure, the titled compound was synthesized by using 2-bromocetophenone (199.04 mg, 1.0 mmol), thiosemicarbazide (91.13 mg, 1.0 mmol) and 3-bromobenzyl alcohol (187.04 mg, 1.0 mmol). Column chromatography (SiO<sub>2</sub>-60-120 mesh, Eluent: *n*-hexane: EtOAc = 20:4) as white solid (yield: 290.81 mg, 81%). <sup>1</sup>H NMR (400 MHz, DMSO) δ 11.45 (s, 1H), 8.14 (s, 2H), 7.93 (s, 1H), 7.78 (s, 1H), 7.59 - 7.30 (m, 7H). <sup>13</sup>C NMR (100 MHz, DMSO) δ 178.1, 168.0, 140.4, 139.3, 136.6, 132.2, 130.6, 128.8, 128.5, 126.9, 125.4, 122.3, 103.9.

**(E)-2-(2-(2-chlorobenzylidene)hydrazinyl)-4-phenylthiazole (4g)**: According to the general procedure, the titled compound was synthesized by using 2-bromocetophenone (199.04 mg, 1.0 mmol), thiosemicarbazide (91.13 mg, 1.0 mmol) and 2-chlorobenzyl alcohol (142.58 mg, 1.0 mmol). Column chromatography (SiO<sub>2</sub>-60-120 mesh, Eluent: *n*-hexane: EtOAc = 20:4) as white solid (yield: 231.41 mg, 73%). <sup>1</sup>H NMR (400 MHz, DMSO) δ 11.62 (s, 1H), 8.46 (d, *J* = 2.8 Hz, 1H), 8.37 (d, *J* = 3.0 Hz, 1H), 8.26 (t, 2H), 8.10 (s, 1H), 7.82 (d, *J* = 7.5 Hz, 1H), 7.43 (d, *J* = 7.2 Hz, 2H), 7.36 (d, *J* = 3.8 Hz, 3H). <sup>13</sup>C NMR (100 MHz, DMSO) δ 178.1, 167.8, 150.5, 138.2, 136.8, 134.4, 133.0, 132.1, 131.5, 131.3, 131.1, 130.5, 129.8, 129.6, 128.5, 128.1, 127.5, 127.5, 127.3, 127.2, 126.1, 125.4, 103.9.

**(E)-2-(2-(2-nitrobenzylidene)hydrazinyl)-4-phenylthiazole (4h)**<sup>7</sup>: According to the general procedure, the titled compound was synthesized by using 2-bromocetophenone (199.04 mg, 1.0 mmol), thiosemicarbazide (91.13 mg, 1.0 mmol) and 2-nitrobenzyl alcohol (153.114 mg, 1.0 mmol). Column chromatography (SiO<sub>2</sub>-60-120 mesh, Eluent: *n*-hexane: EtOAc = 20:4) as white solid (yield: 318.62 mg, 59%). <sup>1</sup>H NMR (400 MHz, DMSO) δ 11.73 (s, 1H), 8.45 (s, 1H), 8.40 - 8.38 (m, 2H), 8.10 (s, 1H), 8.01 (d, *J* = 7.8 Hz, 2H), 7.84 (d, *J* = 7.5 Hz, 1H), 7.73 (t, *J* = 7.6 Hz, 1H), 7.61 (t, *J* = 7.6 Hz, 1H), 7.42 - 7.28 (m, 2H). <sup>13</sup>C NMR (100 MHz,

DMSO)  $\delta$  178.3, 148.1, 147.3, 137.3, 133.4, 133.3, 130.3, 129.7, 128.6, 128.4, 128.2, 128.2, 127.6, 127.5, 125.4, 124.6, 124.4.

**(E)-2-(2-(2,5-dichlorobenzylidene)hydrazinyl)-4-phenylthiazole (4i):** According to the general procedure, the titled compound was synthesized by using 2-bromocetophenone (199.04 mg, 1.0 mmol), thiosemicarbazide (91.13 mg, 1.0 mmol) and 2,5-dichlorobenzyl alcohol (177.03 mg, 1.0 mmol). Column chromatography (SiO<sub>2</sub>-60-120 mesh, Eluent: *n*-hexane: EtOAc = 20:4) as white solid (yield:188.06 mg, 54%). <sup>1</sup>H NMR (400 MHz, DMSO)  $\delta$  11.77 (s, 1H), 8.41 (s, 1H), 8.31 (s, 1H), 7.53 (d, *J* = 7.0 Hz, 4H), 7.40 (t, *J* = 38.2, 7.1 Hz, 3H). <sup>13</sup>C NMR (100 MHz, DMSO)  $\delta$  167.6, 150.5, 136.8, 135.3, 134.3, 133.2, 132.2, 131.6, 130.5, 129.8, 128.5, 127.6, 125.4, 125.0, 104.2.(ESI-TOF) *m/z*: [M+H]<sup>+</sup>Calcd for C<sub>16</sub>H<sub>11</sub>Cl<sub>2</sub>N<sub>3</sub>S 347.0051; Found 348.0137.

**(E)-2-(2-(2,6-dichlorobenzylidene)hydrazinyl)-4-phenylthiazole (4j):** According to the general procedure, the titled compound was synthesized by using 2-bromocetophenone (199.04 mg, 1.0 mmol), thiosemicarbazide (91.13 mg, 1.0 mmol) and 2,6-dichlorobenzyl alcohol (177.03 mg, 1.0 mmol). Column chromatography (SiO<sub>2</sub>-60-120 mesh, Eluent: *n*-hexane: EtOAc = 20:4) as white solid (yield:176.18 mg, 51%). <sup>1</sup>H NMR (400 MHz, CDCl<sub>3</sub>)  $\delta$  12.49 (s, 1H), 8.38 (d, *J* = 5.3 Hz, 2H), 8.34-8.247 (m, 2H), 7.82-7.27 (m, 6H). <sup>13</sup>C NMR (100 MHz, CDCl<sub>3</sub>)  $\delta$  178.2, 169.7, 167.8, 137.5, 133.8, 133.3, 130.8, 129.5, 129.2, 129.0, 128.4, 128.3, 125.3, 125.2, 104.0. (ESI-TOF) *m/z*: [M+H]<sup>+</sup>Calcd for C<sub>16</sub>H<sub>11</sub>Cl<sub>2</sub>N<sub>3</sub>S 347.0051; Found 348.0132.

**(E)-2-(2-(3,4-dimethoxybenzylidene)hydrazinyl)-4-phenylthiazole (4k):** According to the general procedure, the titled compound was synthesized by using 2-bromocetophenone (199.04 mg, 1.0 mmol), thiosemicarbazide (91.13 mg, 1.0 mmol) and 3,4-dimethoxybenzyl alcohol (168.19 mg, 1.0 mmol). Column chromatography (SiO<sub>2</sub>-60-120 mesh, Eluent: *n*-hexane: EtOAc = 20:4) as white solid (yield:227.38 mg, 67%). <sup>1</sup>H NMR (400 MHz, DMSO)  $\delta$  12.06 (s, 1H), 7.97 (s, 1H), 7.85 (d, *J* = 5.9 Hz, 2H), 7.39 (d, *J* = 7.6 Hz, 3H), 7.29 – 7.27 (m, 3H), 7.16 (d, *J* = 8.6 Hz, 1H), 6.98 (s, 2H), 3.50 (s, 6H). <sup>13</sup>C NMR (100 MHz, DMSO)  $\delta$  168.3, 150.3, 150.0, 148.9, 141.5, 134.6, 128.5, 128.5, 127.4, 127.1, 125.4, 120.2, 111.6, 108.2, 103.3, 55.4, 55.3. (ESI-TOF) *m/z*: [M+H]<sup>+</sup>Calcd for C<sub>18</sub>H<sub>17</sub>N<sub>3</sub>O<sub>2</sub>S 339.1041; Found 340.1142.

**(E)-N-(4-((2-(4-phenylthiazol-2-yl)hydrazono)methyl)phenyl)acetamide(4l):** According to the general procedure, the titled compound was synthesized by using 2-bromocetophenone (199.04 mg, 1.0 mmol), thiosemicarbazide (91.13 mg, 1.0 mmol)

and 4-acetamidobenzyl alcohol (165.19 mg, 1.0 mmol). Column chromatography (SiO<sub>2</sub>-60-120 mesh, Eluent: *n*-hexane: EtOAc = 20:4) as white solid (yield:241.76 mg, 71%). <sup>1</sup>H NMR (400 MHz, DMSO) δ 12.05 (s, 1H), 10.12 (s, 1H), 7.98 (d, *J* = 4.8 Hz, 1H), 7.85 (d, *J* = 6.3, 2.3 Hz, 2H), 7.72 (d, *J* = 8.6 Hz, 1H), 7.65 (d, *J* = 8.6 Hz, 2H), 7.59 (t, *J* = 14.7, 8.6 Hz, 2H), 7.41 – 7.38 (m, 2H), 7.2 (s, 2H), 2.06 (s, 3H). <sup>13</sup>C NMR (100 MHz, DMSO) δ 169.8, 168.2, 149.8, 140.2, 134.6, 128.5, 128.5, 127.9, 126.8, 125.4, 119.0, 103.4, 17.6. (ESI-TOF) *m/z*: [M+H]<sup>+</sup>Calcd for C<sub>18</sub>H<sub>16</sub>N<sub>4</sub>OS 336.1045; Found 337.1132.

**(E)-2-(2-(naphthalen-1-ylmethylene)hydrazinyl)-4-phenylthiazole (4m)**: According to the general procedure, the titled compound was synthesized by using 2-bromocetophenone (199.04 mg, 1.0 mmol), thiosemicarbazide (91.13 mg, 1.0 mmol) and 1-naphthalenemethanol (158.20 mg, 1.0 mmol). Column chromatography (SiO<sub>2</sub>-60-120 mesh, Eluent: *n*-hexane: EtOAc = 20:4) as white solid (yield:248.32 mg, 78%). <sup>1</sup>H NMR (400 MHz, DMSO) δ 11.48 (s, 3H), 11.48 (s, 1H), 8.90 (s, 1H), 8.36 (d, *J* = 8.5 Hz, 1H), 8.30 (d, *J* = 2.3 Hz, 1H), 8.22 (d, *J* = 7.2 Hz, 1H), 8.00 (d, *J* = 4.3 Hz, 3H), 7.60 – 7.56 (m, 4H), 7.40 – 7.42 (m, 3H), 7.37 (s, 2H). <sup>13</sup>C NMR (100 MHz, DMSO) δ 177.7, 140.9, 133.3, 130.2, 129.1, 128.80, 127.2, 126.1, 125.7, 125.5, 122.8s. (ESI-TOF) *m/z*: [M+H]<sup>+</sup>Calcd for C<sub>20</sub>H<sub>15</sub>N<sub>3</sub>S 329.0987; Found 330.1065.

**(E)-4-phenyl-2-(2-(thiophen-2-ylmethylene)hydrazinyl)thiazole (4n)**: According to the general procedure, the titled compound was synthesized by using 2-bromocetophenone (199.04 mg, 1.0 mmol), thiosemicarbazide (91.13 mg, 1.0 mmol) and thiophene-2-methanol (144.17 mg, 1.0 mmol). Column chromatography (SiO<sub>2</sub>-60-120 mesh, Eluent: *n*-hexane: EtOAc = 20:4) as white solid (yield:189.32 mg, 66%). <sup>1</sup>H NMR (400 MHz, DMSO) δ 11.44 (s, 1H), 8.23 (s, 2H), 7.84 (d, *J* = 7.2 Hz, 2H), 7.64 (d, *J* = 5.0 Hz, 1H), 7.56 (s, 2H), 7.44 (d, *J* = 3.5 Hz, 1H), 7.56 (s, 1H), 7.43 (d, *J* = 4.7 Hz, 2H), 7.11 – 7.09 (m, 2H). <sup>13</sup>C NMR (100 MHz, DMSO) δ 177.4, 138.5, 137.6, 130.6, 128.8, 128.5, 127.9, 125.4. (ESI-TOF) *m/z*: [M+H]<sup>+</sup>Calcd for C<sub>14</sub>H<sub>11</sub>N<sub>3</sub>S<sub>2</sub> 285.0394; Found 286.0473.

**(E)-4-phenyl-2-(2-(pyridin-4-ylmethylene)hydrazinyl)thiazole (4o)**<sup>7</sup>: According to the general procedure, the titled compound was synthesized by using 2-bromocetophenone (199.04 mg, 1.0 mmol), thiosemicarbazide (91.13 mg, 1.0 mmol) and 4-pyridinebenzyl alcohol (109.13 mg, 1.0 mmol). Column chromatography (SiO<sub>2</sub>-60-120 mesh, Eluent: *n*-hexane: EtOAc = 20:4) as white solid (yield:175.14 mg, 62%). <sup>1</sup>H NMR (400 MHz, DMSO) δ 12.59 (s, 1H), 8.62 (d, *J* = 6.0 Hz, 2H), 8.01 (s, 1H),

7.85 (d,  $J = 7.5$  Hz, 2H), 7.62 (d,  $J = 6.0$  Hz, 2H), 7.43 – 7.38 (m, 3H), 7.29 (d,  $J = 7.2$  Hz, 1H).  $^{13}\text{C}$  NMR (100 MHz, DMSO)  $\delta$  167.6, 150.5, 149.4, 142.2, 138.1, 134.3, 128.6, 127.6, 125.4, 120.3, 104.51.

## 12.HRMS Spectra of 2-benzylidenehydrazinecarbothioamide (E)

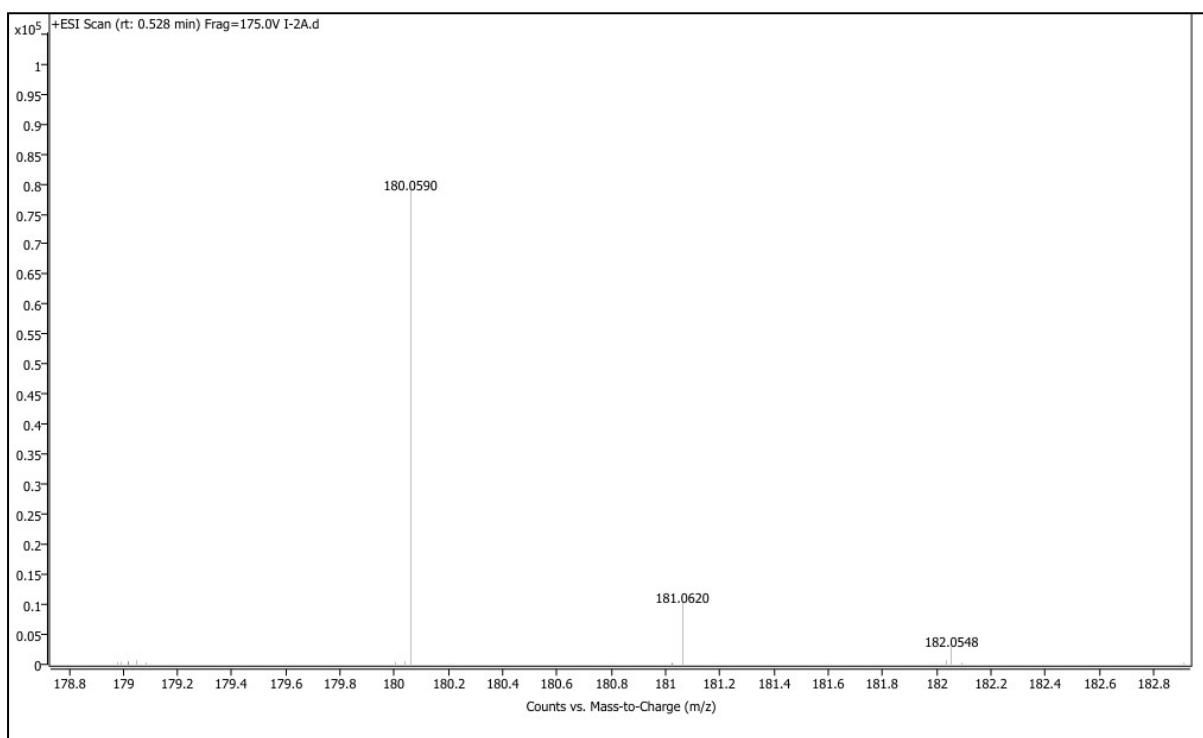

## 12.HRMS Spectrum of 2-benzylidenehydrazinecarbothioamide (E) intermediate

( m/z: [M+H]<sup>+</sup>Calcd for C<sub>8</sub>H<sub>9</sub>N<sub>3</sub>S 180.0595; Found 180.0590)

### 13. Reference

1. A. I Vogel, Test book of practical organic chemistry, Longman, London, 5th edn, **1989**, 395.
2. Bruker, APEX2, SAINT, and SADABS, **2006**.
3. R.H. Blessing, Outlier treatment in data merging, *J. Appl. Crystallogr.* **1997**, *30*, 421
4. Sheldrick, G. M. A short history of SHELX. *Acta Crystallographica Section A: Foundations of Crystallogr.* **2008**, *64*, 112-122.
5. Sheldrick, G. M. Crystal structure refinement with SHELXL. *Acta Crystallogr. C Struct. Chem.*, **2015**, *71*, 3-8.
6. L.J. Farrugia, WinGX and ORTEP for Windows: an update. *J. Appl. Crystallogr.* **2012**, *45*, 849.
7. M. S. Alam, L. Liu, Y. E. Lee, D. U. Lee, *Chem. Pharm. Bull.*, 2011, *59*, 568–573.
8. Q. Ding, D. Zhu, H. Jin, J. Chen, J. Ding, H. Wu, *Phosphorus Sulfur Silicon Relat. Elem.*, 2011, *186*, 220–224.
